---

# Spatiotemporal heterogeneity of glioblastoma is dictated by microenvironmental interference

---

**Vidhya M. Ravi**<sup>1,2,3,4,5#</sup>, **Paulina Will**<sup>1,2,3,5#</sup>, **Jan Kueckelhaus**<sup>1,2,3,5,6#</sup>, **Na Sun**<sup>7\*</sup>, **Kevin Joseph**<sup>1,2,3,5\*</sup>, **Henrike Salié**<sup>3,8\*</sup>, Jasmin von Ehr<sup>1,2,3,5</sup>, Lea Vollmer<sup>1,2,3,5</sup>, Jasim K. Benotmane<sup>1,2,3,5</sup>, Nicolas Neidert<sup>1,2,3,5</sup>, Marie Follo<sup>3,9</sup>, Florian Scherer<sup>3,9</sup>, Jonathan M Goeldner<sup>1,2,3,5</sup>, Simon P. Behringer<sup>1,2,3,5</sup>, Pamela Franco<sup>3,4,5</sup>, Ulrich G. Hofmann<sup>3,4</sup>, Christian Fung<sup>2,3</sup>, Jürgen Beck<sup>2,3,11</sup>, Roman Sankowski<sup>3,12</sup>, Marco Prinz<sup>3,11,12,13</sup>, Saskia Killmer<sup>3,8</sup>, Bertram Bengsch<sup>3,8,13</sup>, Axel Karl Walch<sup>7</sup>, **Daniel Delev**<sup>6,10,†</sup>, **Oliver Schnell**<sup>1,2,3,5,†</sup>, **Dieter Henrik Heiland**<sup>1,2,3 †§</sup>

<sup>1</sup>*Microenvironment and Immunology Research Laboratory, Medical Center, University of Freiburg, Germany*

<sup>2</sup>*Department of Neurosurgery, Medical Center, University of Freiburg, Germany*

<sup>3</sup>*Faculty of Medicine, Freiburg University, Germany*

<sup>4</sup>*Neuroelectronic Systems, Medical Center, University of Freiburg, Germany*

<sup>5</sup>*Translational NeuroOncology Research Group, Medical Center, University of Freiburg, Germany*

<sup>6</sup>*Neurosurgical Artificial Intelligence Laboratory Aachen (NAILA), Department of Neurosurgery, RWTH University of Aachen, Aachen, Germany*

<sup>7</sup>*Research Unit Analytical Pathology, Helmholtz Zentrum München, Neuherberg, Germany.*

<sup>8</sup>*Department of Medicine II: Gastroenterology, Hepatology, Endocrinology, and Infectious Disease, University Medical Center Freiburg, Freiburg, Germany.*

<sup>9</sup>*Department of Medicine I, Medical Center – University of Freiburg, Faculty of Medicine*

<sup>10</sup>*Department of Neurosurgery, RWTH University of Aachen, Aachen, Germany*

<sup>11</sup>*Center for NeuroModulation (NeuroModul), University of Freiburg, Freiburg, Germany*

<sup>12</sup>*Institute of Neuropathology, Medical Center - University of Freiburg,*

<sup>13</sup>*Signalling Research Centres BIOSS and CIBSS, University of Freiburg, Germany*

**# Equal contributed first authorship**

**\* Equal contributed second authorship**

**† Equal contributed last authorship**

**§ Lead contact and corresponding author**

**DISCLOSURE OF CONFLICTS OF INTEREST:** No potential conflicts of interest were disclosed by the authors.

**Corresponding author:**

Dieter Henrik Heiland

Microenvironment and Immunology Research Laboratory

Department of Neurosurgery

Medical Center University of Freiburg

Breisacher Straße 64

79106 Freiburg

-Germany-

Tel: +49 (0) 761 270 50010

Fax: +49 (0) 761 270 51020

E-mail: [dieter.henrik.heiland@uniklinik-freiburg.de](mailto:dieter.henrik.heiland@uniklinik-freiburg.de)

## 45 **Abstract**

46 Glioblastomas are highly malignant tumors of the central nervous system. Evidence suggests that these  
47 tumors display large intra- and inter-patient heterogeneity hallmarked by subclonal diversity and  
48 dynamic adaptation amid developmental hierarchies<sup>1-3</sup>. However, the source for dynamic reorganization  
49 of cellular states within their spatial context remains elusive. Here, we in-depth characterized  
50 glioblastomas by spatially resolved transcriptomics, metabolomics and proteomics. By deciphering  
51 exclusive and shared transcriptional programs across patients, we inferred that glioblastomas develop  
52 along defined neural lineages and adapt to inflammatory or metabolic stimuli reminiscent of reactive  
53 transformation in mature astrocytes. Metabolic profiling and imaging mass cytometry supported the  
54 assumption that tumor heterogeneity is dictated by microenvironmental alterations. Analysis of copy  
55 number variation (CNV) revealed a spatially cohesive organization of subclones associated with reactive  
56 transcriptional programs, confirming that environmental stress gives rise to selection pressure.  
57 Deconvolution of age-dependent transcriptional programs in malignant and non-malignant specimens  
58 identified the aging environment as the major driver of inflammatory transformation in GBM, suggesting  
59 that tumor cells adopt transcriptional programs similar to inflammatory transformation in astrocytes.  
60 Glioblastoma stem cells implanted into human neocortical slices of varying age levels, independently  
61 confirmed that the ageing environment dynamically shapes the intratumoral heterogeneity towards  
62 reactive transcriptional programs. Our findings provide insights into the spatial architecture of  
63 glioblastoma, suggesting that both locally inherent tumor as well as global alterations of the tumor  
64 microenvironment shape its transcriptional heterogeneity. Global age-related inflammation in the human  
65 brain is driving distinct transcriptional transformation in glioblastomas, which requires an adjustment of  
66 the currently prevailing glioma models.

## 67 Article

68 In recent years, novel technologies for single-cell analysis have provided insights into transcriptional  
69 regulation and the dynamic evolution of single cells within brain tumors as well as healthy human  
70 brain<sup>1,4-9</sup>. Large single-cell RNA sequencing (scRNA-seq) studies of high- and lower-grade glioma have  
71 elegantly demonstrated that intratumoral heterogeneity and dynamic plasticity across cellular states are  
72 hallmarks of malignant brain tumors<sup>1,7,9</sup>. It was assumed that this dynamic adaptation falls within four  
73 different states, namely the mesenchymal-like (MES-like), neural progenitor cell-like (NPC-like),  
74 astrocyte-like (AC-like) and the oligodendrocytic precursor cell-like (OPC-like) state, mirroring  
75 developmental stages of the human brain<sup>1,3</sup>. Within this complex network of glioma, it was shown that  
76 neighboring cells such as neurons, glial- and immune cells contribute to the intricate and dynamically  
77 heterogeneous system<sup>1,7,10-13</sup>. However, a major drawback of single cell analysis is the lack of  
78 information regarding their spatial arrangement, which allows only indirect predictions of cellular and  
79 microenvironmental interactions. The spatial organization of tissue is of high importance in a number of  
80 organs, and the brain above all, is particularly dependent on the spatial organization of cortical layers.  
81 Thus, it is likely that spatial organization patterns are also imitated by CNS-derived malignancies. Spatial  
82 transcriptomics, a novel technology is able to provide transcriptomics data at nearly single-cell  
83 resolution, while preserving the spatial architecture<sup>14-16</sup>.

84

### 85 **Deciphering spatially resolved transcriptional heterogeneity and lineages**

86 To characterize the spatial architecture of glioblastoma, we created an atlas of spatially resolved  
87 transcriptomics (stRNA-seq) of twenty-four specimens resulting in 94,482 transcriptomes across  
88 different age-groups, anatomic regions and pathologies, **Figure 1a and Extended Data Figure 1-3,**  
89 **Patient information in Supplementary Table 1.** Transcriptomes from non-malignant samples  
90 demonstrated similarities across patients whereas malignant transcriptomes were marked by individual  
91 gene expression patterns, **Figure 1b.** To evaluate whether malignant transcriptomes resulted from  
92 somatic alterations, we estimated copy number variations (CNVs) from the average expression of genes  
93 in large chromosomal regions within each spot, which confirmed the typical gain in chromosome 7 and/or  
94 loss in chromosome 10 in the majority of malignant spots, **Figure 1c-d and Extended Data Figure 1-**  
95 **3.** The high number of individual copy-number alterations and mutational profiles are assumed to drive

96 patient-specific transcriptional regulation<sup>1</sup> resulting in individual clusters of transcriptomes, similar to  
 97 results seen in other studies<sup>1,2</sup>.

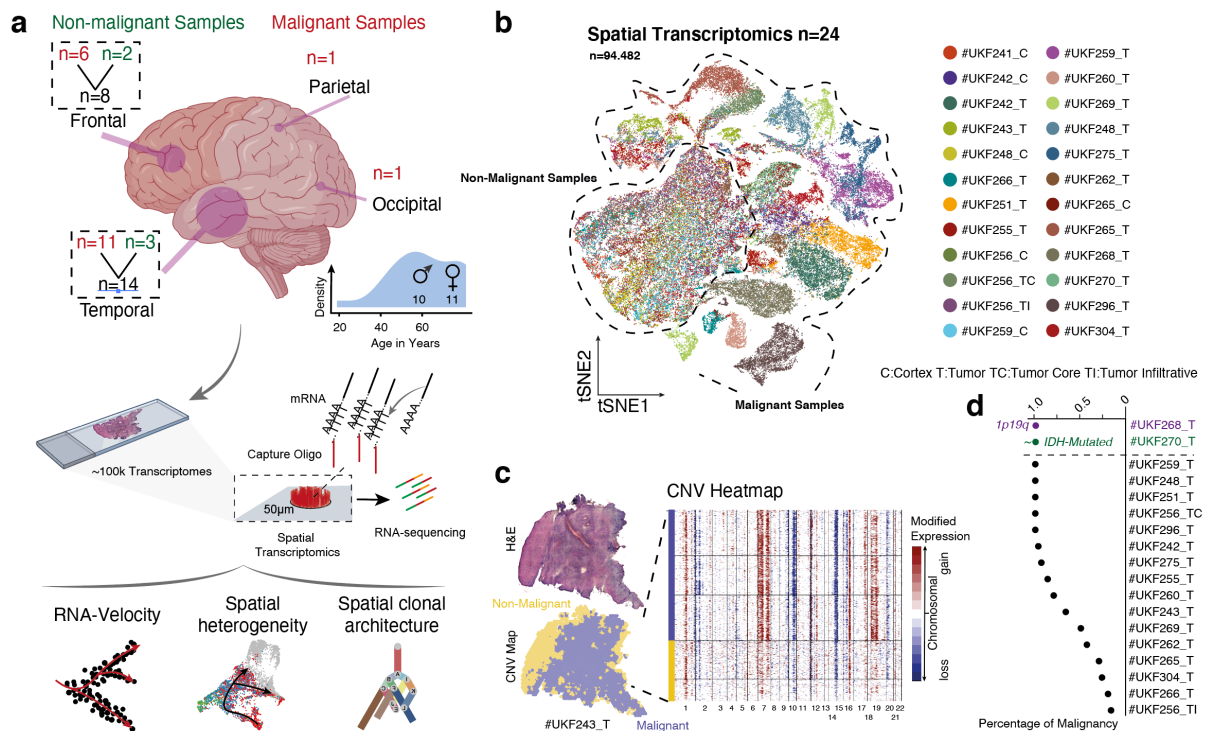

98  
 99 *Figure 1: a) Illustration of the workflow and the cohort of spatial datasets (right) and an overview of analytic approaches (right). b)*  
 100 *A scatterplot of the tSNE representation with distinct areas of malignant and non-malignant samples. Color reflects individual*  
 101 *specimens and patients. c) Illustration of an example of patient #UKF243, a tumor sample which also contained non-malignant*  
 102 *areas (marked in yellow) as indicated by the CNV heatmap at the right side. d) Dotplot of the percentage of malignant spots within*  
 103 *the stRNA-seq data set based on CNV estimation.*

104  
 105 In order to address the intra-tumor heterogeneity with respect to their spatial architecture, we estimated  
 106 shared signatures across patients which reflect common states and lineages within glioblastoma (GBM),  
 107 using a combination of two mutually reinforcing approaches. First, we mapped distinct transcriptional  
 108 programs of individual tumors and then sought for shared programs across all patients. Next, we  
 109 determined the spatial expression patterns through a generalized linear spatial model and identified  
 110 recurring patterns across all patients. Through integration of both approaches, we were able to map  
 111 common transcriptional programs within the spatial context of glioblastoma. After eliminating small and  
 112 partially overlapping clusters within each patient, we identified a total of 139 patient-specific clusters,  
 113 **Extended Data Figure 4a**. To identify shared expression modules, we excluded cell cycle-associated  
 114 clusters and identified 6 distinct modules that were consistently expressed across all patients, **Figure**  
 115 **2a, Supplementary Table 2 and Extended Data Figure 4a-c**. Of note, this approach allowed us to  
 116 understand the biological significance of transcriptional programs among patient-specific clusters that

117 occur repetitively and were robustly expressed. Our identified modules encompass two major groups  
118 involving developmental and inflammatory/hypoxia-associated transcriptional programs, later referred  
119 to as “reactive states”. In contrast to the recent described injury response signature<sup>2</sup> of glioblastoma,  
120 our data indicate that two distinct subtypes of reactive states coexist and emerge spatially segregated  
121 from each other, **Extended Data Figure 5a-b**. The first module revealed a strong enrichment in  
122 glycolysis-related pathways and those involved in the response to reduced oxygen-levels (false  
123 discovery rate [FDR] < 0.01, hypergeometric test), therefore named as “Reactive Hypoxia” **Extended**  
124 **Data Figure 5a**. The second module was marked by an enrichment in INF-gamma signaling (false  
125 discovery rate [FDR] < 0.01, hypergeometric test), the expression of numerous immune-related genes  
126 (e.g. *HLA-DRA*, *HLA-A*, *HLA-B*) and the signature genes of inflammatory (also referred to as A1-state<sup>17</sup>)  
127 reactive astrocytes (e.g. *GFAP*, *VIM*, *CD44*), and is henceforth named as “Reactive Immune”, **Extended**  
128 **Data Figure 5b**. Spatially resolved projection of both signatures revealed a partial overlap, explained  
129 by a subset of genes which were upregulated in response to both reactive signatures such as *CCL2*,  
130 *CHI3L1* and complement factors, **Extended Data Figure 5c-d**. The remaining modules (3-6) were  
131 referred to as “lineage states”, containing genes which were associated with developmental stages,  
132 **Figure 2a-b**. To align our modules along known development hierarchies, we estimated the similarity  
133 to gene signatures of developmental cell types<sup>18</sup>, **Extended Data Figure 5e**, and therefore named the  
134 modules as “OPC-like”, “Radial-Glia-like”, “NPC-like-Early Development” and “NPC-like-Late  
135 Development”, **Figure 2b, Extended Data Figure 5f-k**.

136 Next, we focused on repeating spatial patterns, where we identified a total number of 81 genes, shared  
137 across all patients, **Extended Figure 4e-j, Supplementary Table 3**. We clustered these genes  
138 according to their spatially resolved projections using a Bayesian spatial-correlation approach, resulting  
139 in 3 different patterns. These spatial patterns were found to be highly overlapping with our prior  
140 clustering, suggesting that cells of the hypoxia-reactive states were spatially congruent to pattern 1, and  
141 the immune-reactive states were represented in pattern 2, **Extended Figure 4e**. The lineage states,  
142 predominantly NPC-like and OPC-like, were present in pattern 3, while the radial glia overlapped with  
143 reactive and lineage patterns **Extended Data Figure 5 i-k**. Our findings suggest that the observed intra-  
144 tumor heterogeneity involves individual lineages mirroring brain development, which is consistent with  
145 the findings of others<sup>3,19</sup>. However, we also observed reactive states in response to various pathological  
146 conditions reminiscent of transcriptional signatures reported for reactive astrocytes<sup>20–25</sup>.

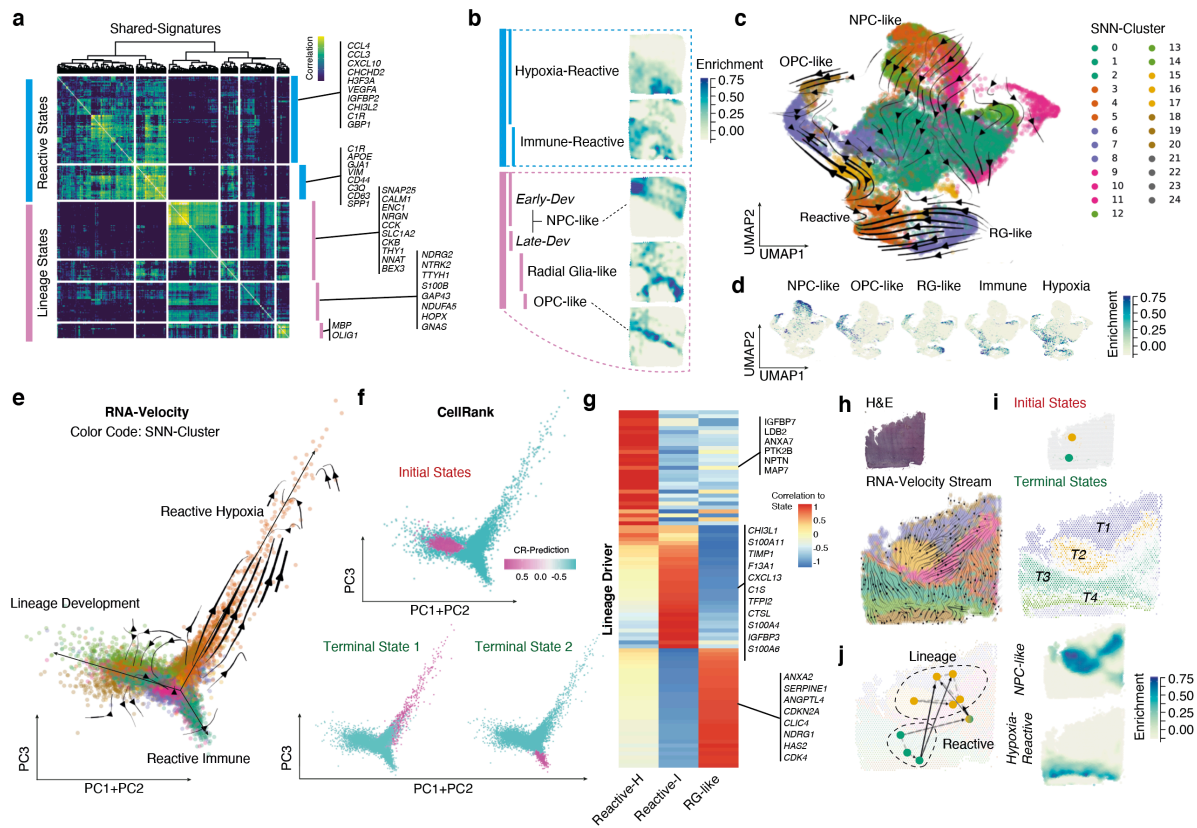

147

148

149

150

151

152

153

154

155

156

157

158

159

160

161

## Immune or metabolic environment drives spatially exclusive cell fates

162

163

164

165

166

167

To comprehensively interrogate dynamic adaptations, we annotated the RNA-velocity of all tumor cells (InferCNV-analysis: gain Chr7 and loss Chr 10), **Figure 2c-d**, and realigned all cells according to their lineage origin, presented by the first 3 principal components, **Figure 2e**. Macro states including initial and terminal states were estimated by Markov chains based on annotated RNA velocity and transcriptomic similarity (CellRank<sup>26</sup>). Our data indicated that reactive states likely arose from former phylogenetic lineage-differentiated origins, **Figure 2f**. The identified transcriptional programs that drive

168 the reactive transformation were closely related to signature genes of known states of reactive  
169 astrocytes<sup>21</sup> (*CHI3L1*, *C1S*), **Figure 2g**. We observed that initial and terminal states undergo dynamic  
170 shifts, and the direction of cellular differentiation was not unambiguously determined, reflecting the  
171 enormous plasticity of glioblastomas, **Figure 2h-j, Extend Data Figure 6**. To evaluate the impact of  
172 metabolic alterations in the observed reactive patterns, we performed Matrix-assisted Laser  
173 Desorption/Ionization Fourier Transform Ion Cyclotron Resonance imaging mass spectrometry (MALDI-  
174 FTICR-MSI) of consecutive slices in six patients (spatial transcriptomic blocks) and traced back  
175 metabolic alterations in the regions of unique transcriptional states, **Figure 3a, Supplementary Table**  
176 **1**. Spatial metabolomic profiling revealed less intra-patient variability compared to the transcriptional  
177 data, suggesting that metabolic heterogeneity based on regional imbalances indeed exists across all  
178 patients, **Figure 3b**. We observed regional alterations of fatty acid metabolism and glycolysis  
179 overlapping with signature expression of the hypoxic reactive state, **Figure 3c-e**. Regions with increased  
180 glycolysis also showed additional gains on chromosome 7 and a strong enrichment of genes associated  
181 with glycolysis, confirming the consistency of our data.

182 To understand and validate our findings at single-cell resolution, we performed imaging mass cytometry  
183 of consecutive sections (6 patients, 14 different 1000 $\mu$ m regions of interest, ROI) resulting in a  
184 comprehensive proteomic map of 82,179 cells after segmentation, **Figure 3f, Supplementary Table 1**.  
185 Based on state specific markers, we confirmed the distribution of GBM cells within ROIs of lineage,  
186 reactive immune or hypoxia differentiation, **Figure 3g**. In particular, we found that T cells CD3(+) were  
187 preferentially localized in regions of tumor cells with a reactive differentiation without significant  
188 differences between hypoxic and immune reactive regions. CD68(+) myeloid cells were similarly  
189 distributed across all reactive- and lineage-state-ROIs, however, CD163(+) myeloid cells were  
190 significantly enriched in immune reactive ROIs (ANOVA,  $p=0.001$ ), **Figure 3h**. By mapping the different  
191 spatial levels of tumor infiltration, we found that activated myeloid cells marked by CD163, SPP1 and  
192 HLA-DR were enriched in regions of reactive inflammation GBM state, **Figure 3i**. Additionally, we  
193 showed that GBM cells and GBM-associated reactive astrocytes VIM(+)/C3(+) form a scar-like formation  
194 at the tumor border.

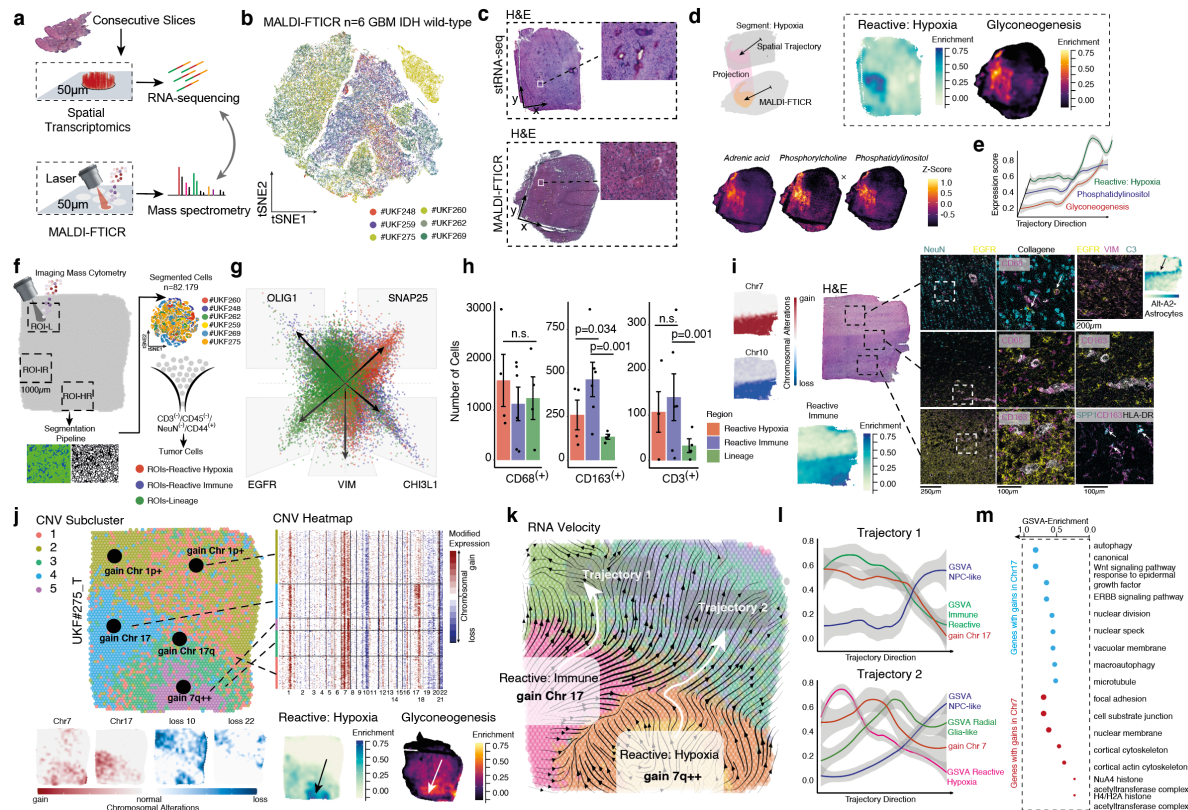

195

196

197

198

199

200

201

202

203

204

205

206

207

208

209

210

211

212

213

214

215

216

Figure 3: a) Illustration of the workflow. b) Dimensional reduction scatter plot (tSNE) of all batch-corrected specimens (indicated by colors). c) Hematoxylin and eosin stain (H&E) of the spatial transcriptomic sample (upper panel) and the sample for MALDI-FTICR-MSI (bottom panel). Arrows indicate the bottom left side of the sample. d) Spatial overlap of both techniques was performed by manual segmentation (illustrated in the left panel). In the right panel, surface plots of gene set variation analysis or metabolic intensities (z-score enrichment of metabolic pathways) are illustrated. e) Spatial and metabolic intensities are demonstrated along a spatial trajectory (d, upper plot). f) Illustration of the IMC workflow and segmentation pipeline. g) Scatterplot of state-specific markers to determine regional distribution of cell states. Colors indicate the ROIs. h) Bar plots of cell counts in different ROIs. Error bars illustrate the standard error and significance levels were determined by ANOVA. i) Sample with tumor and infiltration areas (#UKF\_269). CNV surface plots indicate the chromosomal alterations at spatial resolution (left) indicating low tumor penetrance in the upper regions. IMC ROIs are marked in the H&E staining. IMC images (right) from all regions illustrate the different distribution of tumor cells (EGFR), neurons (NeuN) and myeloid cells (CD68 and CD163). Right upper panel, reactive astrocytes (VIM/C3) and GBM cells (EGFR) are presented at the tumor boarder. The enrichment of the alternative-A2-transcriptional signature is illustrated at the right side. Right-bottom, immunostaining (IMC) of SPP1, HLA-DR and CD163 illustrate the typical tumor-associated activated myeloid cells. j) Hierarchical clustering of the estimated CNV alterations is presented (at spatial resolution, right panel) or in a CNV heatmap. At the bottom, CNV surface plots indicate the chromosomal alterations at spatial resolution (left) and the corresponding spatial and metabolic intensities (enrichment). k) RNA-velocity stream at spatial resolution, colors indicate the SNN clusters. Arrows mark spatial trajectories along the velocity streams. l) Line plots of both trajectories demonstrate the gene set enrichment of subtypes and chromosomal alterations along the velocity streams. m) Gene set enrichment analysis of the 25% most altered genes (estimated CNV score) on chromosome 7 and 17.



## 217 **Spatiotemporal lineages and transcriptional plasticity in glioblastoma**

218 Based on the assumption that environmental conditions shape transcriptomic states, we aimed to  
219 explore to what extent these conditions cause selective pressure, leading to more resistant tumor  
220 subclones. Using a hidden Markov model, we predicted the spatially resolved subclonal architecture,  
221 **Figure 3j**. We found that only a subset of patients revealed subclones as defined by different CNVs in  
222 our examined regions. These patients showed a non/small overlap between individual subclones,  
223 leading to the assumption that the subclonal architecture was not randomly distributed, **Figure 3k**. We  
224 estimated the pseudotemporal hierarchy using RNA velocity, which demonstrated a large variance of  
225 bidirectional subtype shifts across subclonal regions, and highlights the transcriptional plasticity of  
226 GBM's, **Extended Data Figure 7**. A less common alteration of chromosome 17 was correlated with the  
227 enrichment scores of the reactive immune subclass, **Figure 3j-k and Extended Data Figure 7**. The  
228 upper 0.25 quantile of altered genes on chromosome 17 showed a pathway enrichment in Wnt/ $\beta$ -catenin  
229 (Wnt), which is known to subvert cancer immunosurveillance<sup>27</sup>, and in ErbB protein family signaling,  
230 **Figure 3m**. A spatial overlap of gains in chromosome 7 and hypoxic-related signature enrichment was  
231 observed, which followed the same pattern along the RNA-velocity stream (Trajectory 2), **Figure 3k-m**.  
232 Enrichment analysis of the most altered genes on chromosome 7 revealed dysregulation of focal  
233 adhesion and of the actin cytoskeleton, suggesting increased migratory capacity which may be required  
234 for escape from metabolic imbalance, **Figure 3m**.

235

## 236 **Patient-specific spatially resolved gene expression is driven by age**

237 Our analysis revealed that environmental factors shape distinct transcriptional programs, which partially  
238 explained the high inter-patient variance. Global changes of the neural environment which arise during  
239 aging remain less explored but are of high importance. Several neurological diseases such as  
240 Alzheimer's disease (AD) or Multiple Sclerosis (MS) cause a general inflammatory environment and  
241 drive the inflammatory transformation of glia cells<sup>17,28,29</sup>. An increase of inflammatory transformation was  
242 also reported for the aging brain, which could be caused by damage to the blood-brain-barrier<sup>30</sup>. We  
243 hypothesized that age-related alterations in the neural environment may also support glioblastoma  
244 transcriptional plasticity and differentiation. Indeed, we observed an unbalanced age distribution within  
245 our identified transcriptional subclasses which revealed a shift towards increased reactive adaptation  
246 within elderly patients, **Figure 4a**. In order to elucidate the biological significance of aging in GBM and  
247 in the human brain, we acquired spatial transcriptomic datasets (n=6) from non-malignant specimens

248 across different age groups, ranging from 19 to 81 years. We confirmed the absence of malignant cells  
249 by inferring somatic alterations, **Extended Data Figure 8a-b**. Common markers of reactive astrocytes  
250 (*GFAP*, *CHI3L1* and *C1R*) were up-regulated in elderly cortical specimens, **Figure 4c**, leading to the  
251 assumption that the aging environment may also contribute to the reactive transformation seen in GBM.  
252 To underpin our hypothesis, we estimated common age-related gene expression meta-modules and  
253 identified genes which were associated with neural differentiation and plasticity (*ENC1*, *SNAP25*  
254 *VSNL1*), all of which were significantly downregulated in elderly patients **Figure 4d and Extended Data**  
255 **Figure 8c-f**. Common markers of reactive astrocytes such as *GFAP*, *CHI3L1* and oligodendrocytes  
256 (*MBP*, *PLP1*) were upregulated, **Figure 4e and Extended Data Figure 8h**. Through integration of age-  
257 related co-expression modules from cortex and tumor samples, we identified a shared inflammatory  
258 activation along the estimated temporal trajectory, **Figure 4f**. This corroborated our assumption that the  
259 age-related alterations of the neural environment shapes heterogeneity and cellular differentiation in  
260 GBM which was further confirmed by weighted correlation network analysis using bulk RNA-seq  
261 analysis, **Extended Figure 9**.

262

### 263 **Age influences GBM growth and heterogeneity**

264 Of note, in addition to the investigated tumor- and age-related signaling alterations, GBM commonly  
265 occurs between the 6th and 8th decade of life, implying that the ageing environment contributes to  
266 malignant transformation. To experimentally validate this hypothesis, we used an advancement of our  
267 most recently described novel human neocortical slice model because age-related impacts are difficult  
268 to investigate in murine models. We injected a patient-derived, Zs-green tagged GBM cell line (38y) into  
269 cortical slices from a young (15y, n=6) and an elderly donor (63y, n=7) **Figure 4g**. After 7 days of culture,  
270 we FACS sorted tumor cells and performed scRNA-seq. A total of 5672 cells were obtained, from which  
271 4772 were identified as tumor cells based on their CNV alterations, **Figure 4i, Extended Data Figure**  
272 **10a-e**. Tumor cells injected into the elderly cortical slices revealed lower heterogeneity and a strong  
273 enrichment of reactive markers, **Figure 4i**. Using pseudo-temporal reconstruction of RNA-velocity and  
274 cell fate determination (CellRank), we found that terminal states predominantly contained reactively  
275 transformed cells **Figure 4h**. Additionally, tumor cells obtained from aged cortex slices were more  
276 abundant in the terminal-reactive population, **Figure 4h**. Next we performed differential gene expression  
277 analysis to decipher the impact of an aged-environment on tumor cells which revealed an up-regulation  
278 of genes associated with INF gamma response (*IFIT3*, *IFI6* and *IFIT1*), **Extended Data Figure 10f**, and

279 a loss of known markers of development programs (*H2AFZ* also referred to as *H2AZ1*)<sup>2</sup>. Diffusion map  
 280 re-embedding of the scRNA-seq data indicated a major branching for developmental and reactive  
 281 programs. Along a trajectory ranging from development to reactive cell fates, we observed an increasing  
 282 accumulation of tumor cells from aged cortex slices, **Figure 4j**.

283

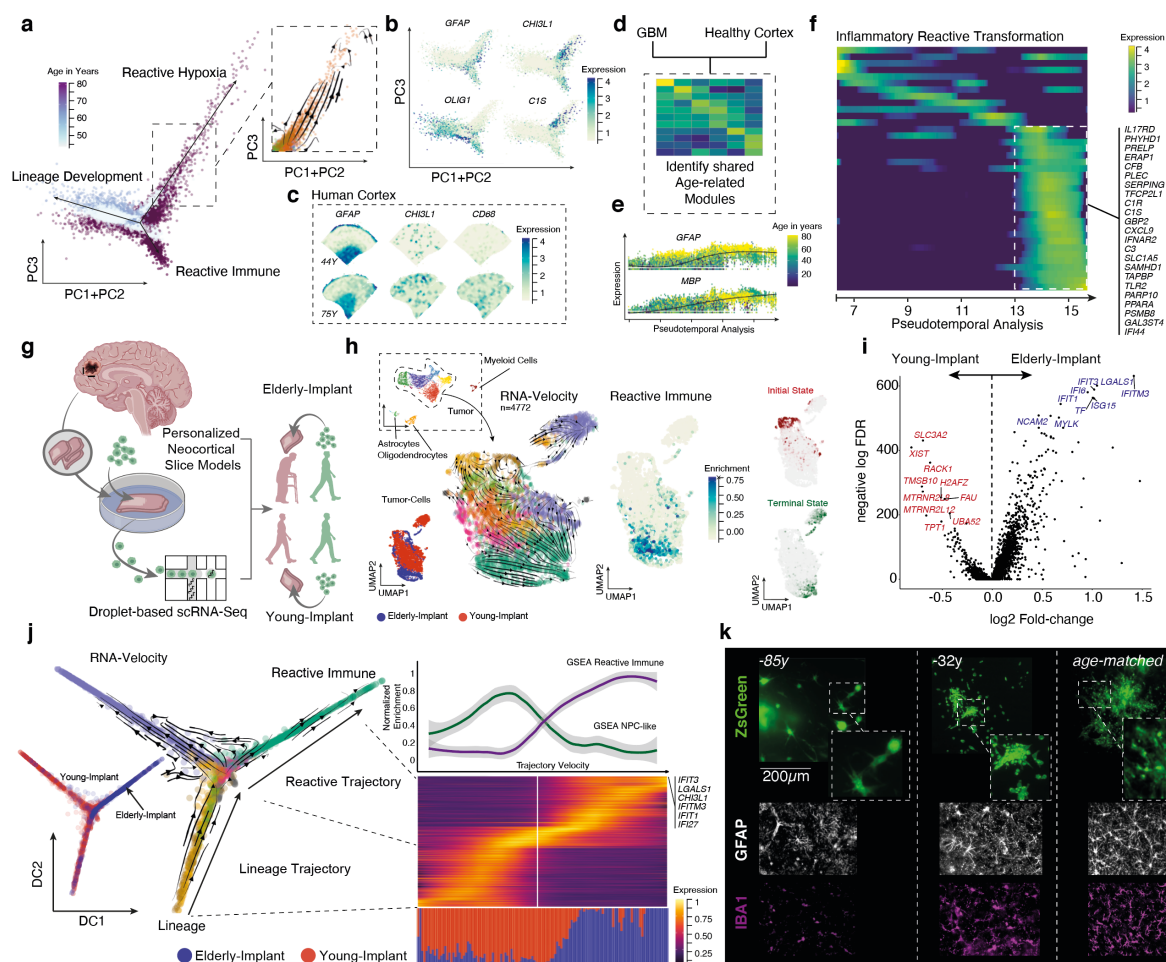

284

285 **Figure 4:** a) Dimensional reduction (see Fig.2 for detailed explanation) of the first three eigenvectors, colors indicate the age of  
 286 patients. Predominantly, highly dynamic branches (right panel) mostly occupied by elderly patients. b) Dimensional reduction  
 287 with gene expression of inflammatory/reactive astrocyte genes. c) Surface plots of non-neoplastic cortex sample of a young (upper  
 288 row) and an elderly patient (lower row). d) GBM and non-neoplastic samples are used to estimate age-related gene expression  
 289 modules. e) Scatter plot of pseudotemporal depended gene expression, colors indicate patient age. f) Heatmap of gene  
 290 expression along the estimated pseudotemporal axis. g) Illustration of the neocortical slice model. h) Dimensional reduction  
 291 (UMAP) of scRNA-seq. UMAPs indicate different sample source (left bottom), RNA-velocity (middle panel) and enrichment of  
 292 reactive/lineage marker expression (right plots). The estimated initial and terminal states are illustrated on the right. i) Volcano  
 293 plot of differential gene expression of tumor cells injected into young- or elderly brain slices. j) Diffusion plots (dimensional  
 294 reduction, with RNA-velocity) indicate the difference of reactive and lineage differentiation along the major axis. Heatmaps of the  
 295 lineage to reactive trajectory are illustrated. On the bottom of the heatmap, a barplot indicates the sample source. A lineplot at the  
 296 top of the heatmap illustrates the gene set enrichment analysis of the reactive immune and NPC-like cell states. k)

297 *Immunostainings of an elderly tumor which was injected into young (left), middle-aged(middle) and age-matched (right) cortical*  
298 *slices. Immunostainings of GFAP and IBA1 indicate (bottom plots) the increased number of reactive glia during aging.*

299

300 To further validate the impact of age-related microenvironmental alterations on growth behavior of  
301 GBM's, we injected GBM cells derived from both elderly and young patients into cortical slices from a  
302 variety of age groups including infantile, middle aged and elderly donors, resulting in significantly  
303 reduced growth rate compared to the younger cell line, **Figure 4k and Extended Data Figure 10g**.  
304 Optimal tumor growth was obtained in age-matched slices, **Extended Data Figure 10g**. Here, we  
305 present a novel approach to illuminate the increased incidence and poorer prognosis of glioblastoma in  
306 the elderly. These insights also affect the further design of tumor models, as so far little attention has  
307 been paid to age-related effects.

308

### 309 **Conclusion**

310 Our investigation uncovered novel insights into the bi- and unidirectional interactions between  
311 microenvironment and transcriptional heterogeneity across time and space in glioblastoma. The in-  
312 depth, spatially resolved characterization of glioblastoma at various molecular levels facilitates the  
313 discovery of the dynamic adaptation of cellular states and spatial relationships within the tumor  
314 microenvironment. In close proximity to developmental trajectories of the brain or adaptive  
315 transformation in various CNS diseases, we uncovered dynamic differentiation of GBM cells along  
316 lineage developmental states and reactive transformations. Deciphering the pathogenesis of each state  
317 demonstrated a close link between metabolic alterations and inflammatory responses as drivers of  
318 reactive adaptation in GBM cells. We demonstrated that age-induced inflammatory processes are the  
319 major cause of transcriptional shift towards reactive states in elderly GBM patients. Using our human  
320 neocortical GBM model across different age groups, we confirmed that glioblastoma heterogeneity and  
321 plasticity is age-related. This suggests that artificial age differences in tumors models lead to spurious  
322 experimental results regarding tumor growth and transcriptional plasticity. Our results suggest that  
323 glioblastoma adapts to the aging brain, necessitating tailored therapeutic approaches and underpinning  
324 the importance of a personalized approach in neuro-oncology.

325

326 **Methods:**

327 **Ethical Approval**

328 The local ethics committee of the University of Freiburg approved the data evaluation, imaging  
329 procedures and experimental design (protocol 100020/09 and 472/15\_160880). The methods were  
330 carried out in accordance with the approved guidelines, with written informed consent obtained from all  
331 subjects. The studies were approved by an institutional review board. Further information and requests  
332 for resources, raw data and reagents should be directed and will be fulfilled by the Contact: D. H.  
333 Heiland, dieter.henrik.heiland@uniklinik-freiburg.de. A complete table of all materials used is given in  
334 the supplementary information.

335

336 **Spatial Transcriptomics:**

337 The spatial transcriptomics experiments were performed using the 10X Visium Spatial Gene Expression  
338 kit (<https://www.10xgenomics.com/spatial-gene-expression>). All the instructions for Tissue Optimization  
339 and Library preparation were followed according to manufacturer's protocol. Here, we briefly describe  
340 the methods followed using the library preparation protocol.

341

342 **Tissue collection and RNA quality control:**

343 Fresh tissue collected immediately post resection was quickly embedded in Tissue-  
344 Tek® O.C.T.™ Compound (Sakura, 4583) and snap frozen in isopentane pre-chilled in liquid nitrogen.  
345 Embedded tissue was stored at -80°C until further processing. A total of 10 sections (10µm each) per  
346 sample were lysed using TriZOL (Invitrogen, 15596026) and used to determine RNA integrity. Total RNA  
347 was extracted using PicoPure RNA Isolation Kit (Thermo Fisher, KIT0204) according to the  
348 manufacturer's protocol. RIN values were determined using a Fragment Analyzer 5200 (RNA kit,  
349 Agilent, DNF-471) according to the manufacturer's protocol. It is recommended to only use samples  
350 with an RNA integrity value >7.

351

352 **Spatial Gene Expression Protocol**

353 10 µm thick sections were mounted onto spatially barcoded glass slides with poly-T reverse transcription  
354 primers, with one section per array. Slides were fixed in 100% methanol and H&E staining was  
355 performed. Brightfield imaging was done at 10x magnification with a Zeiss Axio Imager 2 Microscope,  
356 and post-processing was performed using ImageJ software. Following imaging, permeabilization took

357 place for a pre-determined time to release and capture mRNA from the tissue onto primers on the slide.  
358 Template switch oligos were introduced in order to generate a second strand in a reverse transcription  
359 reaction and produced second strand was cleaved off by denaturation. Next, generated cDNA was  
360 amplified and fragments in the size of interest were selected using SPRIselect reagent (Beckman  
361 Coulter, B23318). Quality check was performed using a Fragment Analyzer (HS NGS Fragment kit,  
362 Agilent, DNF-474). Further, fragmentation and double-sided size selection using SPRIselect reagent  
363 was carried out in order to optimize cDNA fragments for Illumina NextSeq Sequencing System. Unique  
364 indexes as well as P5 and P7 Illumina primers were added to the libraries. The average length of the  
365 final libraries was quantified using a Fragment Analyzer (HS NGS Fragment kit, Agilent, DNF-474) and  
366 the concentration of libraries was determined using a Qubit 1X dsDNA HS kit (Thermo Fisher, Q33231).  
367 Final libraries were diluted to 4nM, pooled and denatured before sequencing on the Illumina NextSeq  
368 550 platform using paired-end sequencing. We used 28 cycles for read 1, 10 cycles per index and 120  
369 cycles for read 2 on a NextSeq 500/550 High Output Kit v2.5 (Illumina, 20024907).

370

### 371 **Data Import and preprocessing, filtering and normalization**

372 Data were analyzed and quality controlled by the cell ranger pipeline provided by 10X. For further  
373 analysis we developed a framework for spatial data analysis. The cell ranger output can be imported  
374 into SPATA by either a direct import function (SPATA::initiateSpataObject\_10X) or manually imported  
375 using count matrix and barcode-coordinate matrix as well the H&E staining. The routine import applies  
376 following steps via the Seuratv4.0 package: To normalize gene expression, values of each spot were  
377 divided by the estimated total number of transcripts and multiplied by 10,000, followed by natural-log  
378 transformation. As described for scRNA sequencing, we removed batch effects and scaled data by a  
379 regression model including sample batch and percentage of ribosomal and mitochondrial gene  
380 expression.

381

### 382 **Dimensional reduction**

383 We used the 2000 most variable expressed genes and decomposed eigenvalue frequencies of the first  
384 30 principal components. We used either the PCA analysis implemented in Seuratv4.0<sup>31</sup> or a  
385 generalized principal component analysis (GLM-PCA) for non-normal distributions<sup>32</sup> due to the fact that  
386 our UMI counts follow multinomial sampling with no zero inflation. The obtained components were used

387 for shared nearest neighbor-Louvain (SNN-Louvain) clustering followed by nonlinear dimensional  
388 reduction using the UMAP or tSNE algorithm. We estimated diffusion maps by the destiny package<sup>33</sup> .

389

### 390 **Clustering and benchmarking**

391 For all cluster approaches of spatial transcriptomics and single-cell RNA-seq we used the non-trivial  
392 estimated eigenvectors. An euclidean distance matrix was computed to identify pairs of cells with shared  
393 neighbors similar to the SNN-Cliq approach<sup>34</sup>. Cluster integrity was estimated by the highest modularity  
394 of each cluster from a graph, based on random connections between nodes<sup>35</sup>. Additionally, we  
395 benchmarked our results by hierarchical clustering, k-Means and Partitioning Around Medoids in which  
396 the optimal k was estimated by gap-statistics. Classical cluster comparison was not performed on the  
397 full dataset due to memory constrains. Cluster with less than 100 spots or less than 20 significantly  
398 differently expressed genes were excluded or defined as outliers. Estimation of the cluster marker genes  
399 was performed by the SPATA implementation of a Wilcoxon sum-rank test.

400

### 401 **Identification of shared transcriptional programs and gene expression modules across patients**

402 First, we performed cluster analysis (SNN, as described above) of malignant spots from each tumor  
403 separately. Selection of meaningful clusters was performed as described above and benchmarked by  
404 various cluster approaches. For each individual cluster, we estimated the number of significantly  
405 expressed genes by the following criteria: Genes with 2.5-fold increase of the average log fold-change  
406 and corresponding p values below 0.05 (False-Discovery Rate of a Wilcoxon Rank Sum test). In order  
407 to ensure non overlapping individual clusters, we merged clusters with a Jaccard index above 70%.  
408 Genes of each clusters were used as cluster signatures for further processing. In the next step, we  
409 estimated the cluster similarity using Jaccard indices and discarded clusters with a lower index than 0.2.  
410 Next, we extracted genes with were represented in more than 70% of all clusters to identify common  
411 expressed signature genes. Using hierarchical clustering of the signature genes by average linkage, we  
412 identified six modules containing 309 genes. We performed benchmarking of our clustering by k-Means  
413 and Partitioning Around Medoids in which the optimal k was estimated by gap-statistics.

414

### 415 **Pattern recognition and clustering**

416 First, we sought for spatially exclusive expressed genes also referred to as spatial expression (SE) using  
417 a generalized linear spatial model implemented in the SPARK algorithm<sup>36</sup>. Through this approach we

418 analyzed each tumor separately and selected all significant SE genes (threshold  $p$  corrected by  
419 Benjamini–Hochberg  $p < 0.001$ ). For further spatial pattern analysis, we selected genes which were  
420 present in at least 75% of all tumors. To unravel the spatial arrangement and detect co-localized  
421 patterns, we estimated spatial co-localization by a Bayesian spatial correlation model of all recurrent SE  
422 genes. This resulted in a correlation matrix which was hierarchically clustered and revealed 5 distinct  
423 patterns. We further summarized these patterns into three major modules based on our findings from  
424 our first approach. The two reactive patterns (hypoxia and immune-related genes) showed distinct from  
425 each other while developmental subcluster (OPC and NPC) revealed a stringer overlap.

426

### 427 **Pathway analysis of gene sets**

428 We performed pathway analysis by three different methods all implemented into our SPATA toolbox. As  
429 presented in our figured we used gene set variation analysis (GSVA) or z-scored enrichment of gene  
430 sets. The analysis was performed through the GSVA package<sup>37</sup>. For GO-term enrichment we used the  
431 DOSE package and cluster profiler<sup>38</sup>.

432

### 433 **Comparison of cortex and tumor samples**

434 First, we merged all cortex samples ( $n=5$ ) with a total number of 17.275 transcriptomes. For batch effect  
435 removal, we read the data into a monocle3<sup>39</sup> object and aligned samples by matching mutual nearest  
436 neighbors (monocle3::align\_cds)<sup>40</sup>. Next, we performed pseudotime analysis by setting the root into  
437 spots from a 19-years old cortex sample. The estimated mean pseudotime per sample and real age  
438 showed a significant correlation ( $R^2=0.56$   $p < 0.031$ ). To detect genes which are differentially expressed  
439 along our estimated age-trajectory, we performed Moran's I statistics, a measure of multi-directional and  
440 multi-dimensional spatial autocorrelation<sup>41</sup>. We merged genes into modules which were co-expressed  
441 across all spots using the monocle3:: find\_gene\_modules() function. Next, we performed similar steps  
442 using tumor samples (with altered CNVs) and compared modules by similarity using the Jaccard-index.  
443 We identified a shared module which was highly enriched in elderly patients containing immune related  
444 gene expression.

445

### 446 **Weighted correlation analysis of the TCGA database**

447 In order to confirm the increase of inflammatory genes in elderly patients we performed a weighted  
448 correlation network analysis (WGCNA) with age as a co-variable<sup>42</sup>. The TCGA gene expression dataset



449 (RNA-seq Bulk GBM) was downloaded from the GlioVis database<sup>43</sup>. In a first step, we estimated the  
450 soft-thresholding power (sft) which was required to reach scale-free topology by iterating over  $p=1, \dots,$   
451 10. Using an unsigned network architecture, we reached scale-free topology at a sft of 5. We performed  
452 block wise WGCNA using a Pearson-correlation measurement and a deep split of 2. Next, we merged  
453 modules with highly correlating eigengenes (WGCNA::mergeCloseModules) and estimated the  
454 eigengene-based connectivity (kME). We correlated the age of patients and the identified kME which  
455 revealed a significant correlation to the kME<sub>magenta</sub>. Next, we characterized the significant correlation  
456 modules by GO-term enrichment analysis and confirmed the inflammatory activation in elderly patients.  
457

### 458 **RNA velocity estimation**

459 We used the CellRanger BAM file to separate expression matrices of spliced and unspliced reads  
460 through the ready-to-use pipeline from the velocity package<sup>44</sup>. The resulting .loom file was read into the  
461 scVelo Seurat wrapper (<https://github.com/satijalab/seurat-wrappers>). We merged the Seurat objects  
462 and performed batch effect removal as explained above. After data integration, Seurat objects with  
463 exonic and intronic gene-level UMI counts were converted into h5ad format  
464 (<https://github.com/mojaveazure/seurat-disk>). We read-in the h5ad files to an AnnData object. Next we  
465 performed normalization and selected the 2,000 most variable expressed genes by the scVelo package  
466 (v0.2.3)<sup>45</sup>. We excluded all genes with less than 20 assigned reads across the exonic and intronic  
467 components and estimated RNA velocity and latent time using the dynamical model. Data will be  
468 exported as .csv files and implemented into a SPATA object for further visualization. The explained  
469 pipeline is implemented into a SPATA wrapper for scVelo (SPATA::getRNA velocity, in the development  
470 branch).

471

### 472 **Infer lineage differentiation by CellRank**

473 After performing the dynamical model, we estimated macro states which represent initial, terminal states  
474 as well as transient intermediate states using the CellRank package (v1.1.0, <https://github.com/theislab/cellrank>)<sup>26,45</sup>. We constructed a transition matrix using the connectivity kernel which was  
475 analyzed by Generalized Perron Cluster Cluster Analysis (GPCCA)<sup>46</sup> after computing a Schur  
476 triangulation. We estimated the probability of all identified macro state (initial and terminal states) in  
477 each spot. The probability vectors are implemented into the fdata slot of the corresponding SPATA  
478 object. Lineage driver genes of each estimated macrostate were identified by the  
479

480 *compute\_lineage\_drivers* function of CellRank. Additionally, we used the partition-based graph  
481 abstraction (PAGA) to simplify state transition in space.

482

### 483 **Visualization of RNA velocity in spatial transcriptomic datasets**

484 Visualization of all tumor samples was performed by using the first 3 principal components (PC1-3)  
485 which was integrated into the AnnData object in the `adata.obsm['X_umap']` slot. The velocity streams  
486 were computed by the `pl.velocity_embedding_stream` function referring to the “X\_umap” slot. In our  
487 spatial transcriptomic data, we aimed to preserve the spatial architecture when adding the velocity  
488 streams. We migrated the spatial coordinates from the SPATA object to the AnnData object into the  
489 `adata.obsm['X_umap']` slot which was used for the `pl.velocity_embedding_stream` function.

490

### 491 **Estimation of transient gene expression programs along RNA velocity streams**

492 In order to estimate transcriptional programs which were dynamically regulated in space (spatial  
493 transcriptomics) and time (RNA velocity estimation) we used the computed velocity streams as spatial  
494 trajectories. Using the `SPATA::createTrajectories` function, we sought for genes which followed a  
495 predefined dynamic along our spatio-temporal trajectory as recently described<sup>47</sup>.

496

### 497 **Spatial gene expression**

498 The visualization of spatial gene expression is implemented in the SPATA software `SPATA::`  
499 `plotSurfaceInteractive`. For spatial expression plots, we used either normalized and scaled gene  
500 expression values (to plot single genes) or scores of a set of genes, using the 0.5 quantile of a probability  
501 distribution fitting. The x-axis and y-axis coordinates are given by the input file based on the localization  
502 at the H&E staining. We computed a matrix based on the maximum and minimum extension of the spots  
503 used (32x33) containing the gene expression or computed scores. Spots without tissue covering were  
504 set to zero. Next, we transformed the matrix, using the squared distance between two points divided by  
505 a given threshold, implemented in the `fields` package (R-software) and adapted the input values by  
506 increasing the contrast between uncovered spots. The data are illustrated as surface plots (`plotly`  
507 package R-software) or as images (`graphics` package R-software).

508

### 509 **Spatial correlation analysis**

510 In order to map spatial correlated gene expression or gene set enrichments we used z-scored ranked  
511 normalized expression values. One gene expression vector or enrichment vector of a gene set is used  
512 to order the spots along a spatial trajectory. We construct the trajectory of spots from lowest ranked to  
513 highest ranked spot (based on z-scored input vectors). The genes of interest (which were correlated  
514 with the spatial trajectory) are fitted by loess-fit from the stats-package (R-software) and aligned to the  
515 ranked spots and scaled. Correlation analysis was performed by Pearson's product moment correlation  
516 coefficient. For heatmap illustration the gene order was computed by ordering the maximal peak of the  
517 loess fitted expression along the predefined spatial trajectory.

518

### 519 **Identification of cycling cells**

520 We used the set of genes published by Neftel and colleagues<sup>1</sup> to calculate proliferation scores based  
521 on the GSVA package implemented in R-software. The analysis based on a non-parametric  
522 unsupervised approach, which transformed a classic gene matrix (gene-by-sample) into a gene set by  
523 sample matrix resulted in an enrichment score for each sample and pathway. From the output  
524 enrichment scores we set a threshold based on distribution fitting to define cycling cells.

525

### 526 **CNV estimation**

527 For CNV analysis we implemented a CNV pipeline into our SPATA R tool available in the development  
528 branch, <https://github.com/theMILOLab/SPATA>. Copy number Variations (CNVs) were estimated by  
529 aligning genes to their chromosomal location and applying a moving average to the relative expression  
530 values, with a sliding window of 100 genes within each chromosome, as described recently<sup>8</sup>. First, we  
531 arranged genes in accordance to their respective genomic localization using the InferCNV package (R-  
532 software)<sup>8</sup>. As a reference set of non-malignant cells, we used a spatial transcriptomic dataset from a  
533 non-malignant cortex sample. To increase speed and computational power, a down-sampling is optional  
534 possible. To avoid the considerable impact of any particular gene on the moving average we limited the  
535 relative expression values  $[-2.6, 2.6]$  by replacing all values above/below  $exp(i)=|2.6|$ , by using the  
536 infercnv package (R-software). This was performed only in the context of CNV estimation as previous  
537 reported<sup>48</sup>. The exported .RDS files were reimported and grouped by chromosomal averages of  
538 estimated CNV alterations and aligned to their spatial position using the *fdata* slot of the SPATA object.  
539 Using the *SPATA::joinWithFeatures()* function extraction of cluster-wise comparison are performed.  
540 Additionally, we implemented the option to select the most altered genes of chromosomes.

541

## 542 **MALDI-FTICR-MSI**

543 Tissue preparation steps for MALDI imaging mass spectrometry (MALDI-MSI) analysis was performed  
544 as previously described<sup>49,50</sup>. Frozen tissues were cryo sectioned at 10  $\mu\text{m}$  from the same tissue block  
545 as used for spatial transcriptomics and thaw mounted onto indium-tin-oxide coated conductive slides  
546 (Bruker Daltonik, Bremen, Germany). The matrix solution consisted of 10 mg/ml 9-aminoacridine  
547 hydrochloride monohydrate (9-AA) (Sigma-Aldrich, Germany) in water/methanol 30:70 (v/v).  
548 SunCollect™ automatic sprayer (Sunchrom, Friedrichsdorf, Germany) was used for matrix application.  
549 The MALDI-MSI measurement was performed on a Bruker Solarix 7T FT-ICR-MS (Bruker Daltonik,  
550 Bremen, Germany) in negative ion mode using 100 laser shots at a frequency of 1000 Hz. The MALDI-  
551 MSI data were acquired over a mass range of  $m/z$  75-1000 with 50  $\mu\text{m}$  lateral resolution. Following the  
552 MALDI imaging experiments, the tissue sections were stained with hematoxylin and eosin (H&E) and  
553 scanned with an AxioScan.Z1 digital slide scanner (Zeiss, Jena, Germany) equipped with a 20x  
554 magnification objective. After the MALDI-MSI measurement, the acquired data underwent spectra  
555 processing in FlexImaging v. 5.0 (Bruker Daltonics, Germany) and SCiLS Lab v. 2020 (Bruker Daltonik  
556 GmbH). MS peak annotation was performed using Human Metabolome Database (HMDB,  
557 <https://www.hmdb.ca/>)<sup>51</sup> and METASPACE (<https://metaspace2020.eu/>)<sup>52</sup>.

558

## 559 **MALDI data analysis**

560 We read-in the files into R using the *readImsML* function from the cardinal package<sup>53</sup>. We reshaped the  
561 pixel data matrix into an intensity matrix and a matrix of coordinates for each tumor separately. We  
562 filtered the  $m/z$  matrix to annotated peaks (METASPACE database) using the *match.closest* function  
563 from the MALDIquant package resulting in a metabolic intensity matrix<sup>54</sup>. The intensity matrix and the  
564 corresponding spatial coordinates were imported into a SPATA object for further spatial data analysis  
565 using the *SPATA::initiateSpataObject\_MALDI*.

566

## 567 **Human Organotypic Slice Culture**

568 Human neocortical slices were prepared as recently described<sup>21,55</sup>. Resected cortical tissue (assessed  
569 by EEG and MRI) was immediately brought to the lab in the “preparation medium” (Gibco Hibernate™  
570 media supplemented with 1 mM Gibco GlutaMax™, 13 mM Glucose, 30 mM NMDG and 1% Anti-Anti)  
571 saturated with carbogen (95% O<sub>2</sub> and 5% CO<sub>2</sub>). Capillaries and damaged tissue were dissected away

572 from the tissue block. The combo of GlutaMax and NMDG in the collection medium has provided us  
573 with best tissue recovery post resection. 300  $\mu\text{m}$  thick cortical slices were obtained using a vibratome  
574 (VT1200, Leica Germany) and incubated in preparation medium for 10 minutes before plating to avoid  
575 any variability due to tissue trauma. Tissue blocks (1 cm  $\times$  2 cm) typically permits preparation of 18–20  
576 sections. One to three sections were gathered per insert, with care to prevent them from touching each  
577 other. The transfer of the slices was facilitated by a polished wide mouth glass pipette. Slice were  
578 maintained in growth medium containing Neurobasal L-Glutamine (Lot No. 1984948; Gibco)  
579 supplemented with 2% serum-free B-27 (Lot No. 175040001; Gibco), 2% Anti-Anti (Lot No. 15240-062;  
580 Gibco), 13 mM d-glucose (Lot No. RNBG7039; Sigma-Aldrich), 1 mM  $\text{MgSO}_4$  (M3409; Sigma-Aldrich),  
581 15 mM HEPES (H0887; Sigma-Aldrich), and 2 mM GlutaMAX (Lot No. 1978435; Gibco) The entire  
582 medium was replaced with fresh medium 24 hours post plating and every 48 hours thereafter.

583

#### 584 **Human ex-vivo Glioblastoma Model:**

585 ZsGreen tagged BTSC#233 and BTSC#168 cell lines were cultured and prepared as described  
586 previously<sup>21</sup>. Briefly, post trypsinization, a centrifugation step was performed, following which the cells  
587 were harvested and re-suspended in PBS for 20,000 cells/ $\mu\text{L}$ . Cells were then used immediately for  
588 injection onto tissue sections. A 10  $\mu\text{L}$  Hamilton syringe was used to inject 1  $\mu\text{L}$  of GBM cells onto the  
589 white matter part of the section. Sections with injected cells were incubated at 37°C for a week and  
590 culture medium was refreshed every alternative days. Tumor proliferation was monitored by regular  
591 fluorescence imaging by means of an inverted microscope (Observer D.1; Zeiss). After a week, sections  
592 were either fixed and used for immunostaining or for single cell sequencing.

593

#### 594 **Single cell suspension from cultured slices**

595 Nine sections per condition were processed using C-Tubes (Miltenyi Biotech, 130-093-237) with a  
596 shortened protocol for the Neural Tissue Dissociation Kit (T) (Miltenyi Biotech, 130-093-231). Briefly, the  
597 tissue as well as the first enzyme mix, containing enzyme T and buffer X, were transferred to a C-tube  
598 and incubated at 37°C for 5 minutes, followed by a rotation for 2 minutes. Next, second enzyme mix,  
599 containing enzyme A and buffer Y, was added and incubated for 5 minutes, followed by another rotation  
600 for 2 minutes. The sample was then filtered and centrifuged in a 50ml falcon and cell pellet was further  
601 used for cell sorting.

602

### 603 **Cell sorting for scRNA-seq**

604 Freshly prepared cell suspensions were washed with FACS buffer containing 2% FCS and 1mM EDTA  
605 in PBS and stained with DAPI. Cells were sorted on the BD FACSAria™ Fusion flow cytometer at the  
606 core facility, University of Freiburg. To gather viable tumor cells, Zs-green positive, DAPI negative  
607 populations were collected in BSA-coated tubes containing 2% FCS in PBS and prepared for later  
608 droplet-based single cell RNA-Sequencing.

609

### 610 **Single cell RNA-sequencing**

611 Single cell RNA-sequencing was performed according to the Chromium Next GEM Single Cell 3'v3.1  
612 protocol (10x Genomics), based on a droplet scRNA-sequencing approach. In brief, collected cells were  
613 added to a prepared master mix containing reagents for a reverse transcription reaction and loaded onto  
614 separate lanes of a Chromium Next GEM Chip G. After running the chip on a Chromium Controller,  
615 generated GEMs were transferred to a tube strip. Following reverse transcription, GEMs were broken,  
616 and cDNA was purified from leftover reagents. Amplified cDNA was fragmented and size-selected using  
617 SPRIselect reagent (Beckman Coulter, B23318). i7 indexes as well as P5 and P7 Illumina primers were  
618 added to the libraries. The average length of final libraries was quantified using a Fragment Analyzer  
619 (HS NGS Fragment kit, Agilent, DNF-474) and the concentration of libraries was determined using a  
620 Qubit 1X dsDNA HS kit (Thermo Fisher, Q33231). Final libraries were diluted to 4nM, pooled and  
621 denatured before sequencing on an Illumina NextSeq 550 Sequencing System (Illumina, San Diego,  
622 CA, USA) using NextSeq 500/550 High Output kit v2.5 (Illumina, 20024906) with 28 cycles for read 1,  
623 8 cycles for i7 index and 56 cycles for read 2.

624

### 625 **Analysis of scRNA-seq**

626 Single cell RNA-seq were processed by 10x Genomics Cell Ranger 3.1.0<sup>56</sup>. Postprocessing was  
627 performed by the MILO-pipeline for scRNA-seq (<https://github.com/theMILOLab/scPipelines>). Single cell  
628 analysis was performed by the Seuratv4.0 package and SPATA 1.0 package. We used the Seurat  
629 wrapper for scVelo<sup>45</sup> to performe pseudotime analysis and Cell Rank<sup>26</sup> for cell fate estimation. After  
630 preprocessing of the data through Seurat, we imported the data into SPATA. Further analysis was  
631 performed as explained in the sections above.

632

### 633 **Imaging mass cytometry antibody panel**

634 A 39-marker IMC panel was designed including structural and tumor markers as well as markers to  
635 assess several innate and adaptive immune cells (**Supplementary Table XX**). Metal-labeled antibodies  
636 were either obtained pre-conjugated (Fluidigm) or labeled in-house by conjugating purified antibodies  
637 to lanthanide metals using the Maxpar X8 antibody labelling kit (Fluidigm) according to the  
638 manufacturer's instructions. In addition, 89-Yttrium (III) nitrate tetrahydrate (Sigma Aldrich, cat. #  
639 217239-10G) and 157-Gadolinium (III) chloride (Trace Sciences Int.) were diluted in L-buffer to a 1M  
640 stock solution and further diluted to a 50  $\mu$ M working solution for subsequent antibody labelling with the  
641 Maxpar X8 labelling kit. Metal-conjugated antibodies were titrated and validated on glioblastoma, brain,  
642 liver and tonsil tissue.

643

#### 644 **Sample preparation and staining for imaging mass cytometry**

645 10  $\mu$ m thick tissue sections on SuperFrost plus slides (R. Langenbrinck GmbH, 03-0060) were dried at  
646 37°C for one minute and fixed in 100% methanol for 30 minutes at -20°C. Slides were rinsed three times  
647 in TBS for 5 minutes each. Tissue sections were encircled with a PAP pen (ImmEdge, Vector  
648 laboratories, H-4000) and blocked for 45 minutes at room temperature using SuperBlock (TBS) Blocking  
649 Buffer (ThermoFisher Scientific, 37581). The sections were then stained with a mix of metal-labeled  
650 primary antibodies diluted in TBS with 0.5% BSA as well as 10% FBS and incubated at room  
651 temperature for one hour. Slides were rinsed in TBS-T (TBS supplemented with 0.2% Tween-20) twice  
652 and twice in TBS for 5 minutes each. Tissue sections were then stained with Iridium Cell-ID intercalator  
653 (500  $\mu$ M, Fluidigm, 201192B) diluted 1:2000 in TBS for 30 minutes at room temperature. Slides were  
654 rinsed three times for 5 minutes in TBS, dipped in ddH<sub>2</sub>O for 5 seconds and air-dried. Slides were stored  
655 at room temperature until image acquisition.

656

#### 657 **Image acquisition**

658 Two to three 1000  $\mu$ m<sup>2</sup> images per patient were acquired using a Hyperion Imaging System (Fluidigm).  
659 Briefly, tuning of the instrument was performed according to the manufacturer's instructions. Tissue  
660 sections were laser ablated spot-by-spot at 200 Hz resulting in a pixel size/resolution of 1  $\mu$ m<sup>2</sup>.  
661 Preprocessing of the raw data was conducted using the CyTOF software v7.0 (Fluidigm) and image  
662 acquisition control was performed using MCD Viewer v1.0.560.6 (Fluidigm).

663

#### 664 **IMC data analysis**

665 Raw data were processed by the bodenmiller pipeline<sup>57</sup>. For single-cell analysis we segmented the cells  
666 based on the nucleus (DNA-staining) using 6 random crops of each image for training. Training was  
667 performed by pixel-wise classification using ilastik<sup>58</sup>. We imported the classification trained images into  
668 cell profiler to extract single cell intensities of segmented cells. We analyzed the spatially resolved  
669 single-cell matrix by SPATA. For import, we used the *SPATA::initiateSpataObject\_MALDI()* function and  
670 performed batch effect removal between images by matching mutual nearest neighbors<sup>40</sup>. Cluster  
671 analysis was performed as explained above.

672

### 673 **Acknowledgement**

674 DHH is funded by the Else Kröner-Fresenius Foundation. The work is part of the MEPHISTO project  
675 (PI: DHH and DD), funded by BMBF (Bundes Ministerium für Bildung und Forschung) (project number:  
676 031L0260B). The Deutsche Forschungsgemeinschaft (DFG, German Research Foundation) supports  
677 the work of AW (project number: SFB 824 C04). VR, KJ and UGH funded by BMBF (Bundes Ministerium  
678 für Bildung und Forschung) (project number: FMT 13GW0230A), We thank Dietmar Pfeifer for here  
679 helpful advices. We thank Biorender.com. We thank Stella Maria Carro for her support and the provision  
680 of her laboratory facilities and equipment.

681

### 682 **Conflict of interests**

683 No potential conflicts of interest were disclosed by the authors.

684

### 685 **Data availability**

686 Spatial Transcriptomic RNA-Sequencing Data available: (in preparation), Accession codes: ... Full  
687 scripts of the analysis are available at github, heilandd/Spatia\_Transcriptomics, The used software tool  
688 is SPatial Transcriptomic Analysis (SPATA) <https://github.com/theMILOLab/SPATA> and Tutorials at  
689 <https://themilolab.github.io/SPATA/index.html>, sc-RNA-seq analysis are Data available: (in preparation),  
690 Accession codes: Analysis tools: VisLabv1.5 [https://github.com/heilandd/Vis\\_Lab1.5](https://github.com/heilandd/Vis_Lab1.5), Further  
691 information and requests for resources, raw data and reagents should be directed and will be fulfilled  
692 by the Contact: D. H. Heiland, [dieter.henrik.heiland@uniklinik-freiburg.de](mailto:dieter.henrik.heiland@uniklinik-freiburg.de).

693

694



695 Bibliography

696

- 697 1. Neftel, C. *et al.* An integrative model of cellular states, plasticity, and genetics for glioblastoma. *Cell*  
698 **178**, 835–849.e21 (2019).
- 699 2. Richards, L. M. *et al.* Gradient of Developmental and Injury Response transcriptional states defines  
700 functional vulnerabilities underpinning glioblastoma heterogeneity. *Nat. Cancer* (2021).  
701 doi:10.1038/s43018-020-00154-9
- 702 3. Couturier, C. P. *et al.* Single-cell RNA-seq reveals that glioblastoma recapitulates a normal  
703 neurodevelopmental hierarchy. *Nat. Commun.* **11**, 3406 (2020).
- 704 4. Grubman, A. *et al.* A single cell brain atlas in human Alzheimer's disease. *BioRxiv* (2019).  
705 doi:10.1101/628347
- 706 5. Darmanis, S. *et al.* A survey of human brain transcriptome diversity at the single cell level. *Proc.*  
707 *Natl. Acad. Sci. USA* **112**, 7285–7290 (2015).
- 708 6. Tabula Muris Consortium. A single-cell transcriptomic atlas characterizes ageing tissues in the  
709 mouse. *Nature* (2020). doi:10.1038/s41586-020-2496-1
- 710 7. Venteicher, A. S. *et al.* Decoupling genetics, lineages, and microenvironment in IDH-mutant  
711 gliomas by single-cell RNA-seq. *Science* **355**, (2017).
- 712 8. Patel, A. P. *et al.* Single-cell RNA-seq highlights intratumoral heterogeneity in primary glioblastoma.  
713 *Science* **344**, 1396–1401 (2014).
- 714 9. Tirosh, I. *et al.* Single-cell RNA-seq supports a developmental hierarchy in human  
715 oligodendroglioma. *Nature* **539**, 309–313 (2016).
- 716 10. Venkatesh, H. S. *et al.* Electrical and synaptic integration of glioma into neural circuits. *Nature* **573**,  
717 539–545 (2019).
- 718 11. Venkataramani, V. *et al.* Glutamatergic synaptic input to glioma cells drives brain tumour  
719 progression. *Nature* **573**, 532–538 (2019).
- 720 12. Wurm, J. *et al.* Astroglial Release of Pro-Oncogenic Chitinase 3-Like 1 Causing MAPK Signaling  
721 in Glioblastoma. *Cancers (Basel)* (2019).
- 722 13. Osswald, M. *et al.* Brain tumour cells interconnect to a functional and resistant network. *Nature*  
723 **528**, 93–98 (2015).
- 724 14. Lein, E., Borm, L. E. & Linnarsson, S. The promise of spatial transcriptomics for neuroscience in  
725 the era of molecular cell typing. *Science* **358**, 64–69 (2017).
- 726 15. Vickovic, S. *et al.* High-density spatial transcriptomics arrays for in situ tissue profiling. *BioRxiv*  
727 (2019). doi:10.1101/563338
- 728 16. Ståhl, P. L. *et al.* Visualization and analysis of gene expression in tissue sections by spatial  
729 transcriptomics. *Science* **353**, 78–82 (2016).
- 730 17. Liddelow, S. A. *et al.* Neurotoxic reactive astrocytes are induced by activated microglia. *Nature*  
731 **541**, 481–487 (2017).
- 732 18. Nowakowski, T. J. *et al.* Spatiotemporal gene expression trajectories reveal developmental  
733 hierarchies of the human cortex. *Science* **358**, 1318–1323 (2017).
- 734 19. Bhaduri, A. *et al.* Outer Radial Glia-like Cancer Stem Cells Contribute to Heterogeneity of  
735 Glioblastoma. *Cell Stem Cell* **26**, 48–63.e6 (2020).

- 736 20. Clarke, L. E. *et al.* Normal aging induces A1-like astrocyte reactivity. *Proc. Natl. Acad. Sci. USA*  
737 **115**, E1896–E1905 (2018).
- 738 21. Henrik Heiland, D. *et al.* Tumor-associated reactive astrocytes aid the evolution of  
739 immunosuppressive environment in glioblastoma. *Nat. Commun.* **10**, 2541 (2019).
- 740 22. Li, K., Li, J., Zheng, J. & Qin, S. Reactive astrocytes in neurodegenerative diseases. *Aging Dis* **10**,  
741 664–675 (2019).
- 742 23. Wasilewski, D., Priego, N., Fustero-Torre, C. & Valiente, M. Reactive astrocytes in brain  
743 metastasis. *Front. Oncol.* **7**, 298 (2017).
- 744 24. Priego, N. *et al.* STAT3 labels a subpopulation of reactive astrocytes required for brain metastasis.  
745 *Nat. Med.* **24**, 1024–1035 (2018).
- 746 25. Anderson, M. A. *et al.* Astrocyte scar formation aids central nervous system axon regeneration.  
747 *Nature* **532**, 195–200 (2016).
- 748 26. Lange, M. *et al.* CellRank for directed single-cell fate mapping. *BioRxiv* (2020).  
749 doi:10.1101/2020.10.19.345983
- 750 27. Galluzzi, L., Spranger, S., Fuchs, E. & López, A. WNT signaling in cancer immunosurveillance.  
751 *Soto*
- 752 28. Yun, S. P. *et al.* Block of A1 astrocyte conversion by microglia is neuroprotective in models of  
753 Parkinson's disease. *Nat. Med.* **24**, 931–938 (2018).
- 754 29. Liddelow, S. A. & Barres, B. A. Reactive astrocytes: production, function, and therapeutic potential.  
755 *Immunity* **46**, 957–967 (2017).
- 756 30. Habib, N. *et al.* Disease-associated astrocytes in Alzheimer's disease and aging. *Nat. Neurosci.*  
757 **23**, 701–706 (2020).
- 758 31. Hao, Y., Hao, S. & Andersen, E. Integrated analysis of multimodal single-cell data. *Nissen*
- 759 32. Townes, F. W., Hicks, S. C., Aryee, M. J. & Irizarry, R. A. Feature selection and dimension reduction  
760 for single-cell RNA-Seq based on a multinomial model. *Genome Biol.* **20**, 295 (2019).
- 761 33. Angerer, P. *et al.* destiny: diffusion maps for large-scale single-cell data in R. *Bioinformatics* **32**,  
762 1241–1243 (2016).
- 763 34. Xu, C. & Su, Z. Identification of cell types from single-cell transcriptomes using a novel clustering  
764 method. *Bioinformatics* **31**, 1974–1980 (2015).
- 765 35. Lun, A. T. L., McCarthy, D. J. & Marioni, J. C. A step-by-step workflow for low-level analysis of  
766 single-cell RNA-seq data with Bioconductor. [version 2; peer review: 3 approved, 2 approved with  
767 reservations]. *F1000Res.* **5**, 2122 (2016).
- 768 36. Sun, S., Zhu, J. & Zhou, X. Statistical analysis of spatial expression patterns for spatially resolved  
769 transcriptomic studies. *Nat. Methods* **17**, 193–200 (2020).
- 770 37. Hänzelmann, S., Castelo, R. & Guinney, J. GSEA: gene set variation analysis for microarray and  
771 RNA-seq data. *BMC Bioinformatics* **14**, 7 (2013).
- 772 38. Yu, G., Wang, L.-G., Han, Y. & He, Q.-Y. clusterProfiler: an R package for comparing biological  
773 themes among gene clusters. *OMICS* **16**, 284–287 (2012).
- 774 39. Qiu, X. *et al.* Reversed graph embedding resolves complex single-cell trajectories. *Nat. Methods*  
775 **14**, 979–982 (2017).
- 776 40. Haghverdi, L., Lun, A. T. L., Morgan, M. D. & Marioni, J. C. Batch effects in single-cell RNA-

- 777 sequencing data are corrected by matching mutual nearest neighbors. *Nat. Biotechnol.* **36**, 421–  
778 427 (2018).
- 779 41. Van den Berge, K. *et al.* Trajectory-based differential expression analysis for single-cell sequencing  
780 data. *Nat. Commun.* **11**, 1201 (2020).
- 781 42. Langfelder, P. & Horvath, S. WGCNA: an R package for weighted correlation network analysis.  
782 *BMC Bioinformatics* **9**, 559 (2008).
- 783 43. Bowman, R. L., Wang, Q., Carro, A., Verhaak, R. G. W. & Squatrito, M. GlioVis data portal for  
784 visualization and analysis of brain tumor expression datasets. *Neuro. Oncol.* **19**, 139–141 (2017).
- 785 44. La Manno, G. *et al.* RNA velocity of single cells. *Nature* **560**, 494–498 (2018).
- 786 45. Bergen, V., Lange, M., Peidli, S., Wolf, F. A. & Theis, F. J. Generalizing RNA velocity to transient  
787 cell states through dynamical modeling. *Nat. Biotechnol.* **38**, 1408–1414 (2020).
- 788 46. Reuter, B., Weber, M., Fackeldey, K., Röblitz, S. & Garcia, M. E. Generalized markov state  
789 modeling method for nonequilibrium biomolecular dynamics: exemplified on amyloid  $\beta$   
790 conformational dynamics driven by an oscillating electric field. *J. Chem. Theory Comput.* **14**, 3579–  
791 3594 (2018).
- 792 47. Kueckelhaus, J. *et al.* Inferring spatially transient gene expression pattern from spatial  
793 transcriptomic studies. *BioRxiv* (2020). doi:10.1101/2020.10.20.346544
- 794 48. Tirosh, I. *et al.* Dissecting the multicellular ecosystem of metastatic melanoma by single-cell RNA-  
795 seq. *Science* **352**, 189–196 (2016).
- 796 49. Aichler, M. *et al.* N-acyl Taurines and Acylcarnitines Cause an Imbalance in Insulin Synthesis and  
797 Secretion Provoking  $\beta$  Cell Dysfunction in Type 2 Diabetes. *Cell Metab.* **25**, 1334–1347.e4 (2017).
- 798 50. Sun, N. *et al.* Pharmacometabolic response to pirfenidone in pulmonary fibrosis detected by  
799 MALDI-FTICR-MSI. *Eur. Respir. J.* **52**, (2018).
- 800 51. Wishart, D. S. *et al.* HMDB 4.0: the human metabolome database for 2018. *Nucleic Acids Res.* **46**,  
801 D608–D617 (2018).
- 802 52. Palmer, A. *et al.* FDR-controlled metabolite annotation for high-resolution imaging mass  
803 spectrometry. *Nat. Methods* **14**, 57–60 (2017).
- 804 53. Bemis, K. D. *et al.* Cardinal: an R package for statistical analysis of mass spectrometry-based  
805 imaging experiments. *Bioinformatics* **31**, 2418–2420 (2015).
- 806 54. Gibb, S. & Strimmer, K. MALDIquant: a versatile R package for the analysis of mass spectrometry  
807 data. *Bioinformatics* **28**, 2270–2271 (2012).
- 808 55. Ravi, V. M. *et al.* Human organotypic brain slice culture: a novel framework for environmental  
809 research in neuro-oncology. *Life Sci. Alliance* **2**, e201900305 (2019).
- 810 56. Zheng, G. X. Y. *et al.* Massively parallel digital transcriptional profiling of single cells. *Nat. Commun.*  
811 **8**, 14049 (2017).
- 812 57. Zanutelli, V. & Bodenmiller, B. A flexible image segmentation pipeline for heterogeneous  
813 multiplexed tissue images based on pixel classification. (2019).
- 814 58. Berg, S. *et al.* ilastik: interactive machine learning for (bio)image analysis. *Nat. Methods* **16**, 1226–  
815 1232 (2019).
- 816 59. Müller, S. *et al.* Single-cell sequencing maps gene expression to mutational phylogenies in PDGF-  
817 and EGF-driven gliomas. *Mol. Syst. Biol.* **12**, 889 (2016).

818

819

820 **Extended Data Figures:**

821 Extended Data Figure 1:

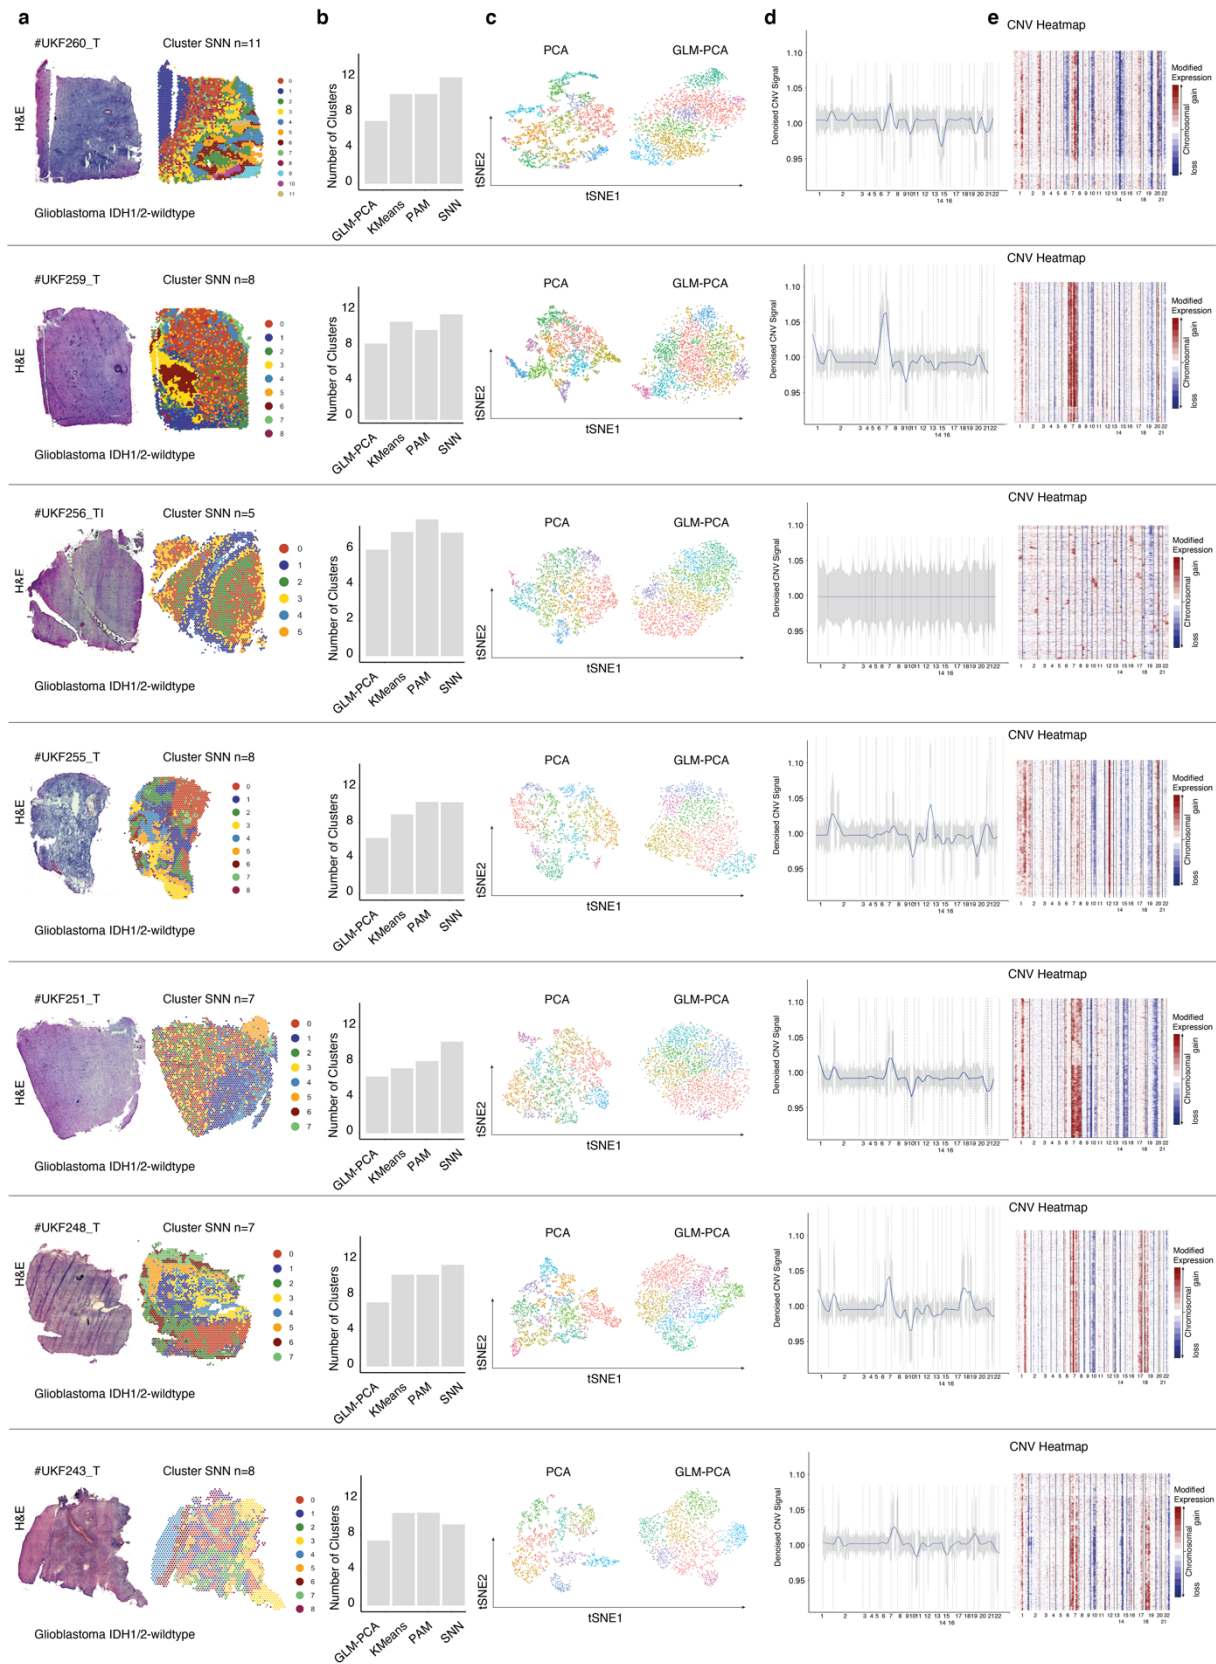

822

823

824 Extended Data Figure 2:

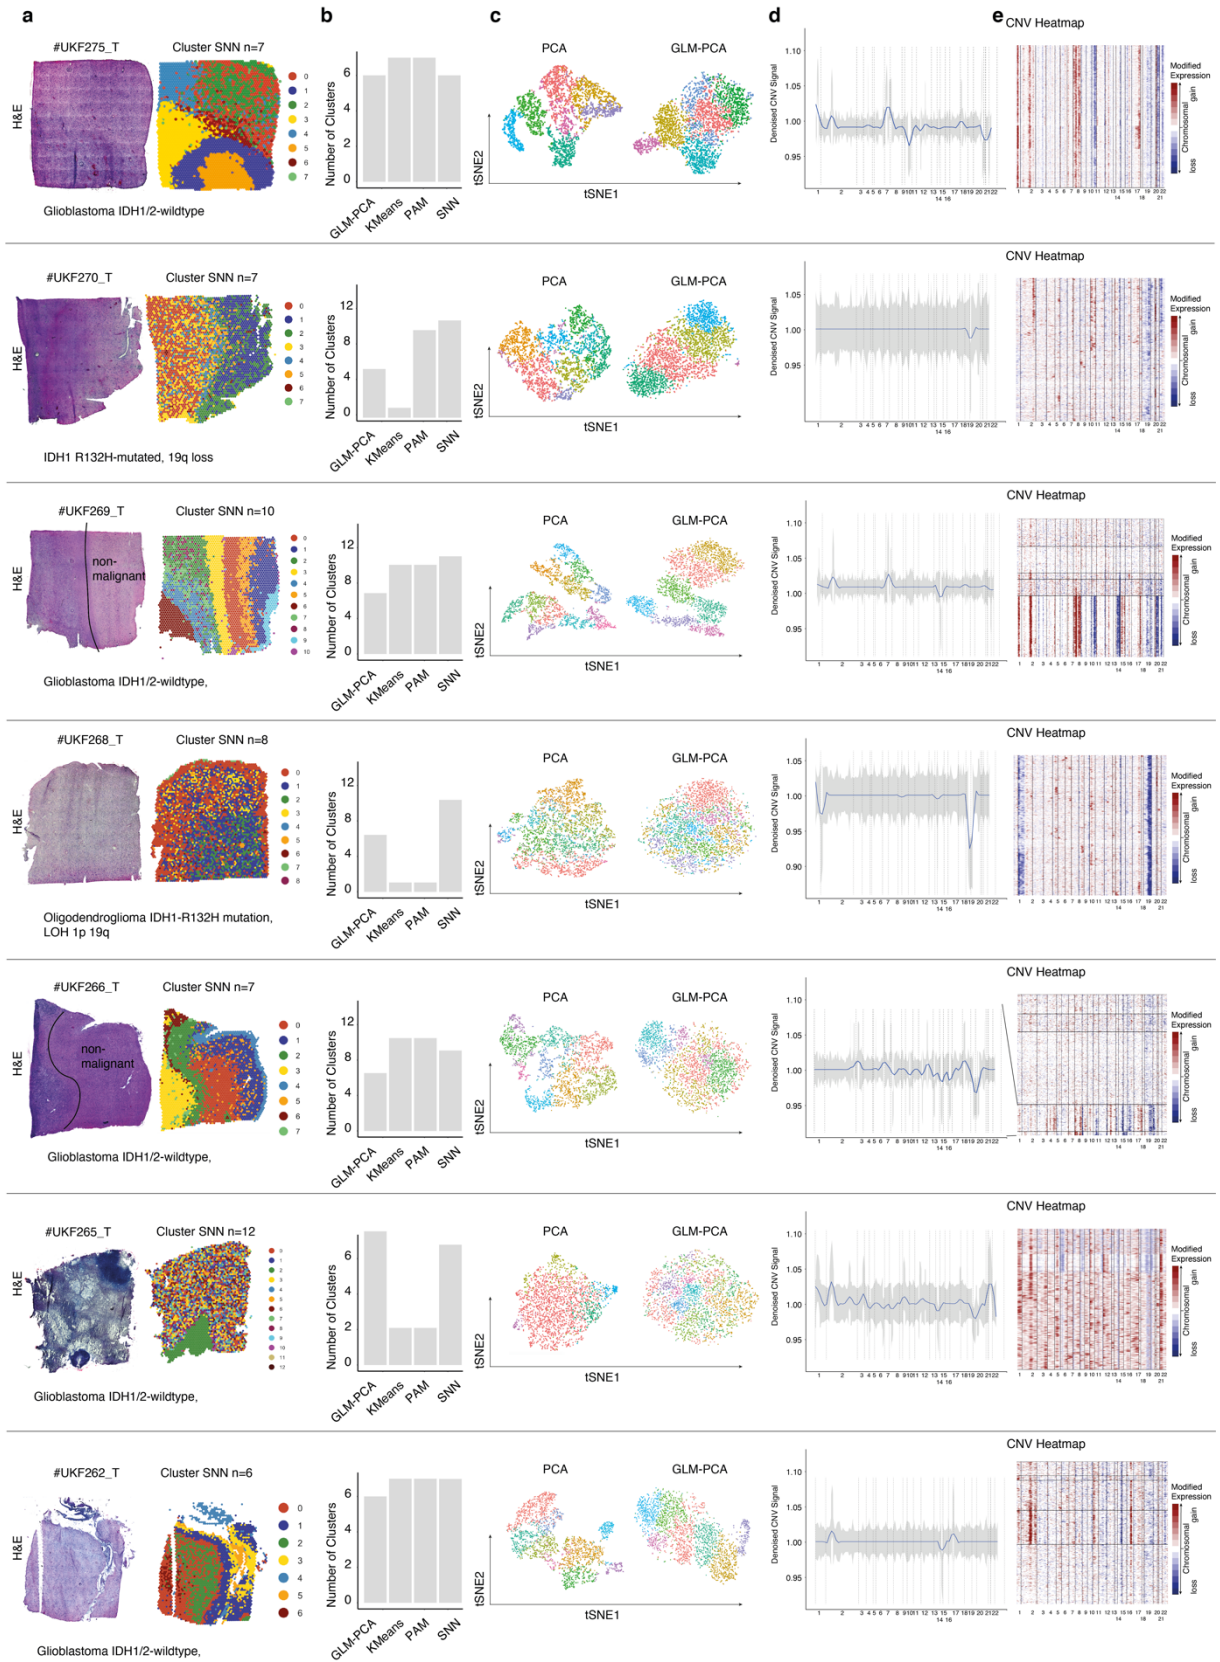

825

826

827 Extended Data Figure 3:

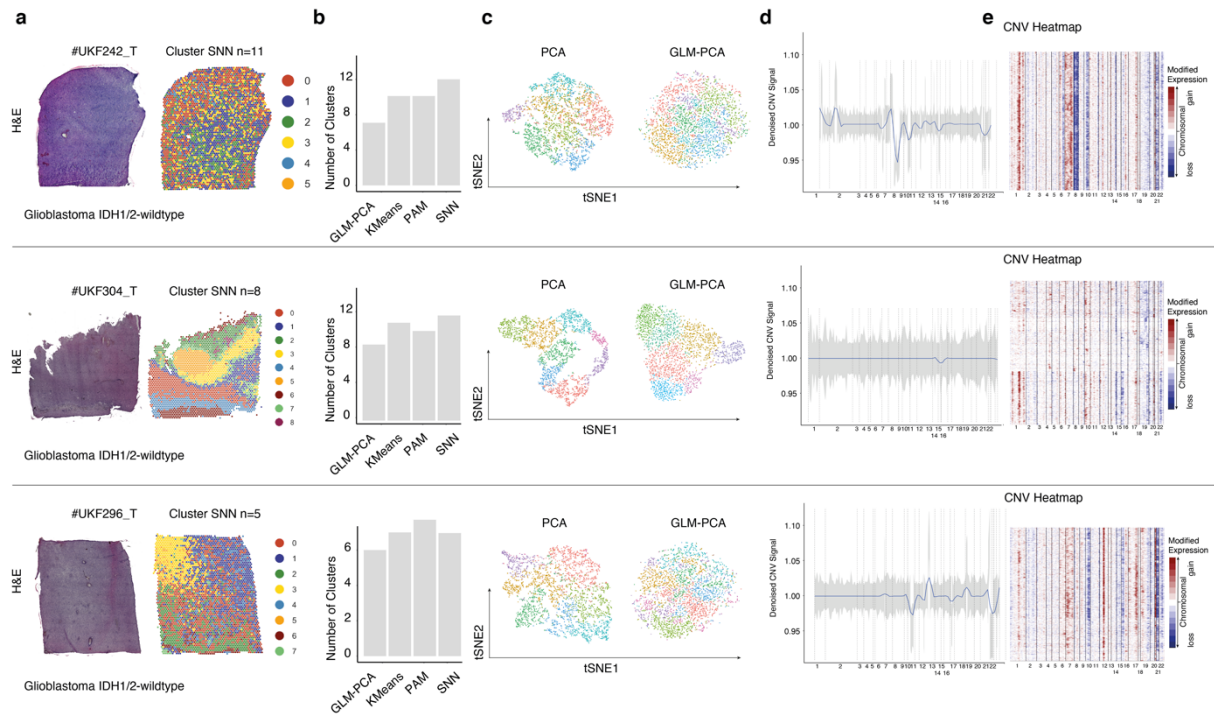

828

829

830 *Extended Data Figure 1-3: a) Overview of samples with H&E staining (left) and SNN clustering (right) b) Validation of different*  
 831 *cluster algorithm. The barplot indicate the estimated optimal number of clusters using a gap statistical approach. c) Dimensional*  
 832 *reduction (tSNE) of a classical PCA analysis and a GLM-PCA approach. d) Line plot of sum CNV alterations estimated by*  
 833 *InferCNV. The gray area indicates the variance of alterations at each chromosome. e) CNV heatmap with gains in red and losses*  
 834 *in blue.*

835

836 Extended Data Figure 4:

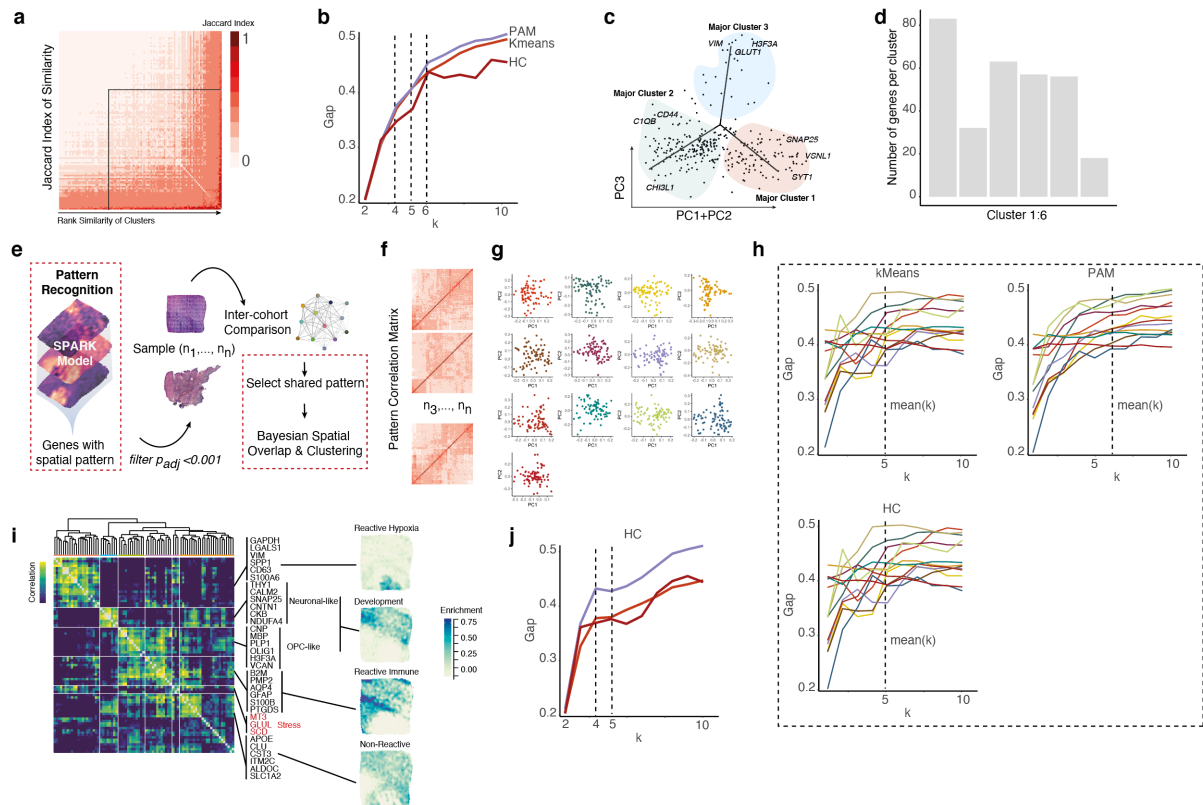

837  
 838 Extended Data Figure 4: a) Heatmap of shared genes across individual clusters (jaccard index). ~2/3 of genes are shared across  
 839 clusters. b) Gap statistic plot of the optimal number of clusters (shared genes of clusters) by various cluster algorithms. i)  
 840 Dimensional reduction of genes shared in all patients using the first three eigenvectors. c) Number of genes of all identified clusters  
 841 (signature genes of subclasses). d) Illustration of the pattern recognition approach. e) Example of the distance matrix of genes  
 842 detected by SPARK. The correspondent PCA plots are illustrated at the right side (f) g) Gap statistics analysis of the optimal  
 843 number of clusters using different algorithms. Colors indicate the individual patients. h) Heatmap of the three major cluster  
 844 recognized by hierarchical clustering. i) Gap statistic plot of the optimal number of clusters by various cluster algorithms.  
 845



846 Extended Data Figure 5:

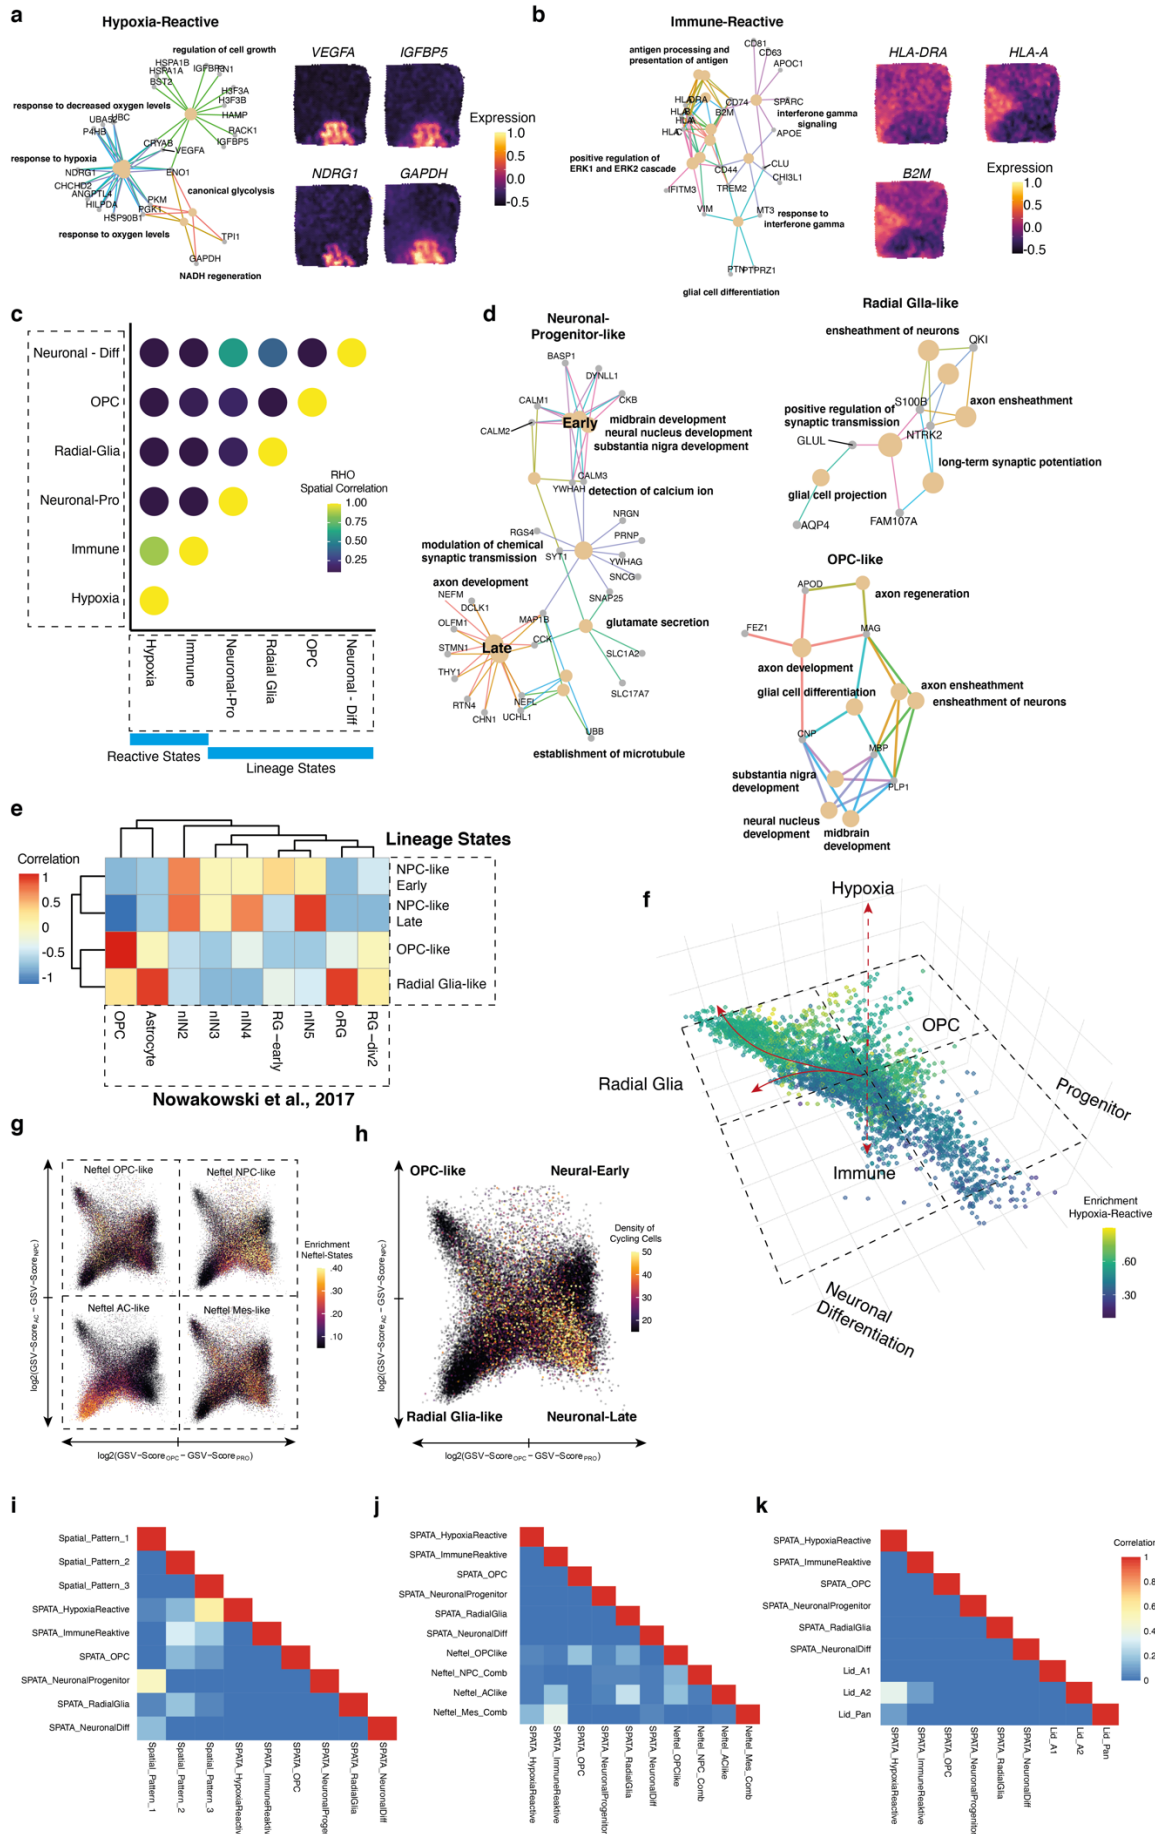

848 *Extended Data Figure 5: a) Network plot of top enriched pathways of the hypoxic signature. Surface plot of four example genes*  
849 *related to hypoxic response (right) b) Network plot of top enriched pathways of the immune signature. Surface plot of three*  
850 *example genes related to immune response (right) c) Estimated spatial overlap using a Bayesian correlation analysis. The plot*  
851 *indicates signatures occupying similar regions in space. d) Network plot of top enriched pathways of the lineage signatures. e)*  
852 *Analysis of similarity for all lineage stages using the Nowakowski<sup>59</sup> dataset as reference. f-h) comparison of the Neftel subgroups*  
853 *and the novel signatures. I) Comparison between the signatures of reactive astrocytes, pattern analysis, shared genes approach*  
854 *and the Neftel study.*  
855  
856

857 Extended Data Figure 6:

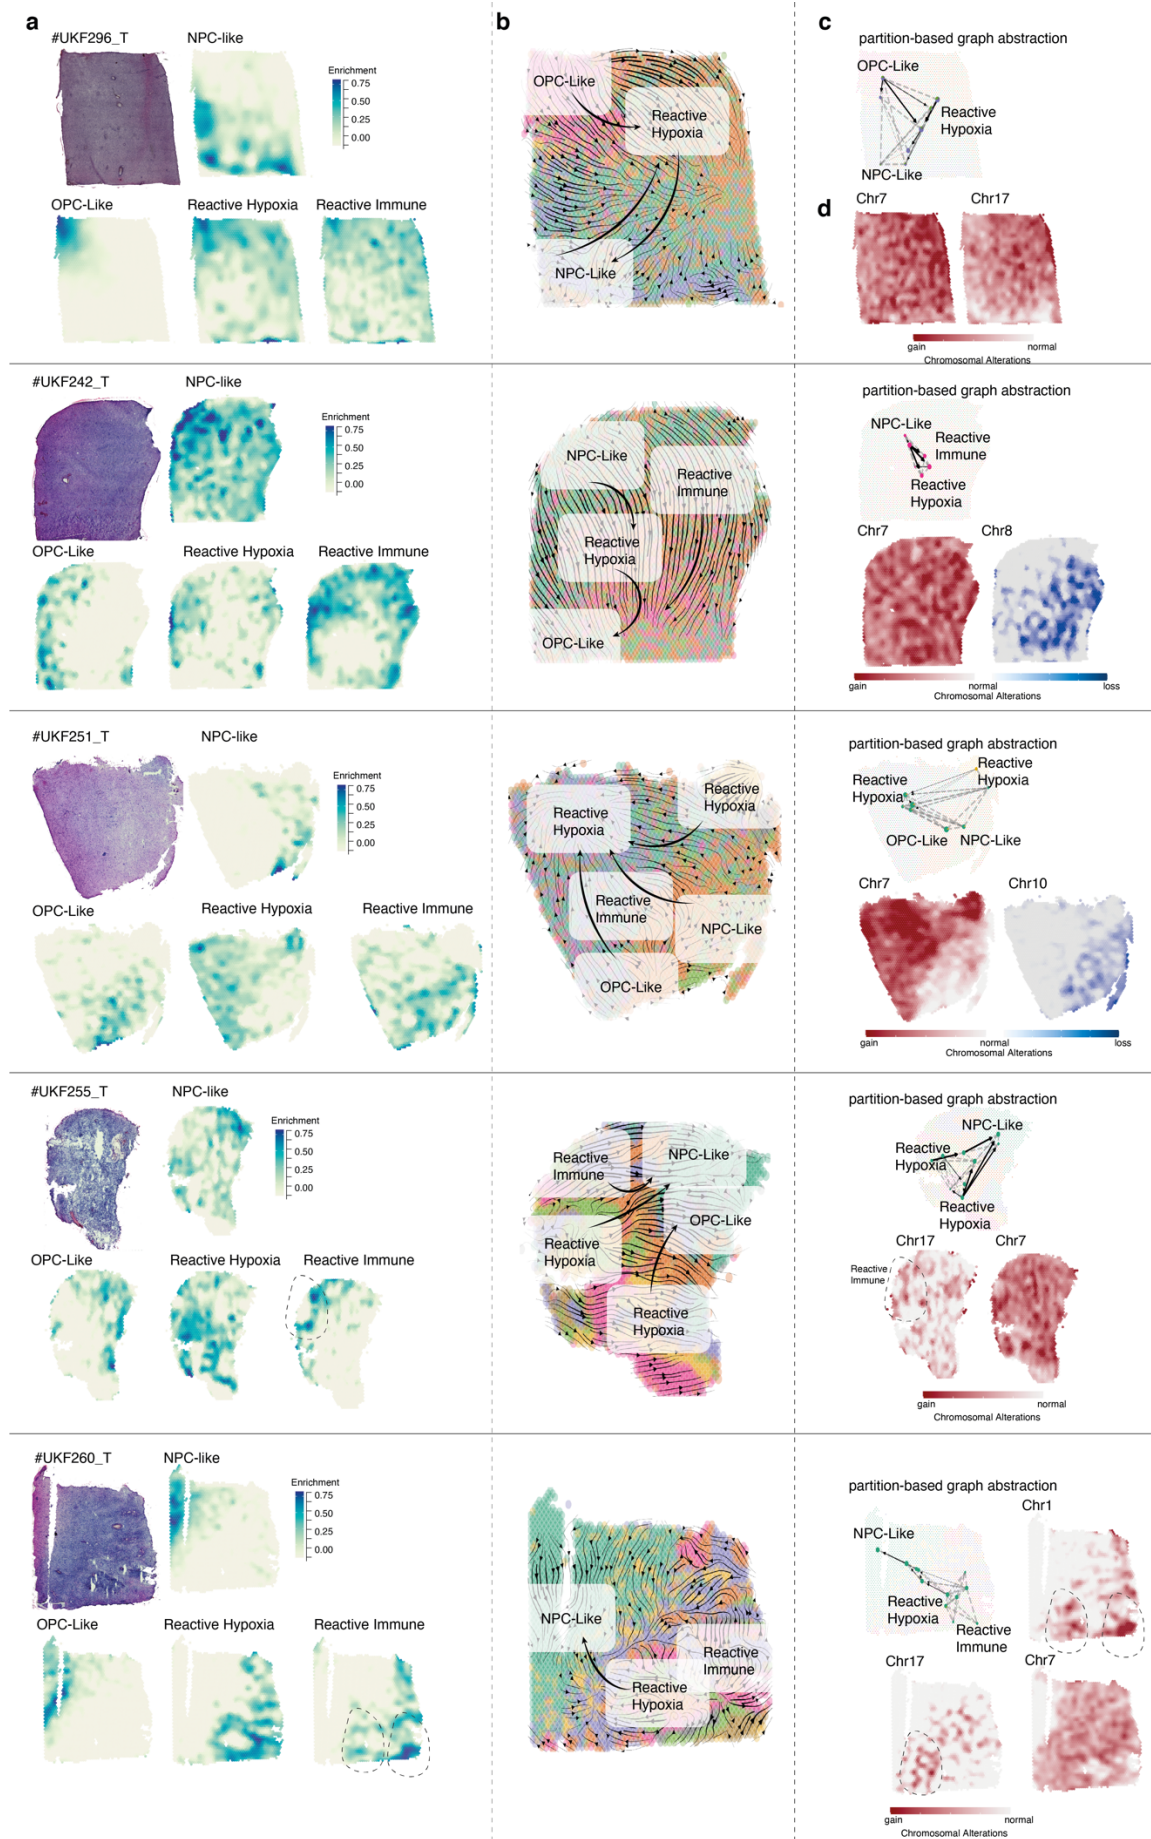

858

859 *Extended Data Figure 6: a) H&E staining (left upper) and enrichment surface plots of lineage (NPC- and OPC-like signatures)*  
860 *and reactive genes (hypoxic and immune) b) RNA-velocity stream analysis with arrow which indicate the pseudotemporal*  
861 *development trajectories. Subgroup location is marked as well major differentiation trajectories. c) Aggregation of individual fate*  
862 *maps into a cluster-level fate map using partition-based graph abstraction (PAGA) with directed edges indicates the direction of*  
863 *differentiation at spatial resolution d) Surface plot of estimated CNV alterations of individual patients, red indicate chromosomal*  
864 *gains, blue reveals chromosomal losses.*  
865

866 Extended Data Figure 7:

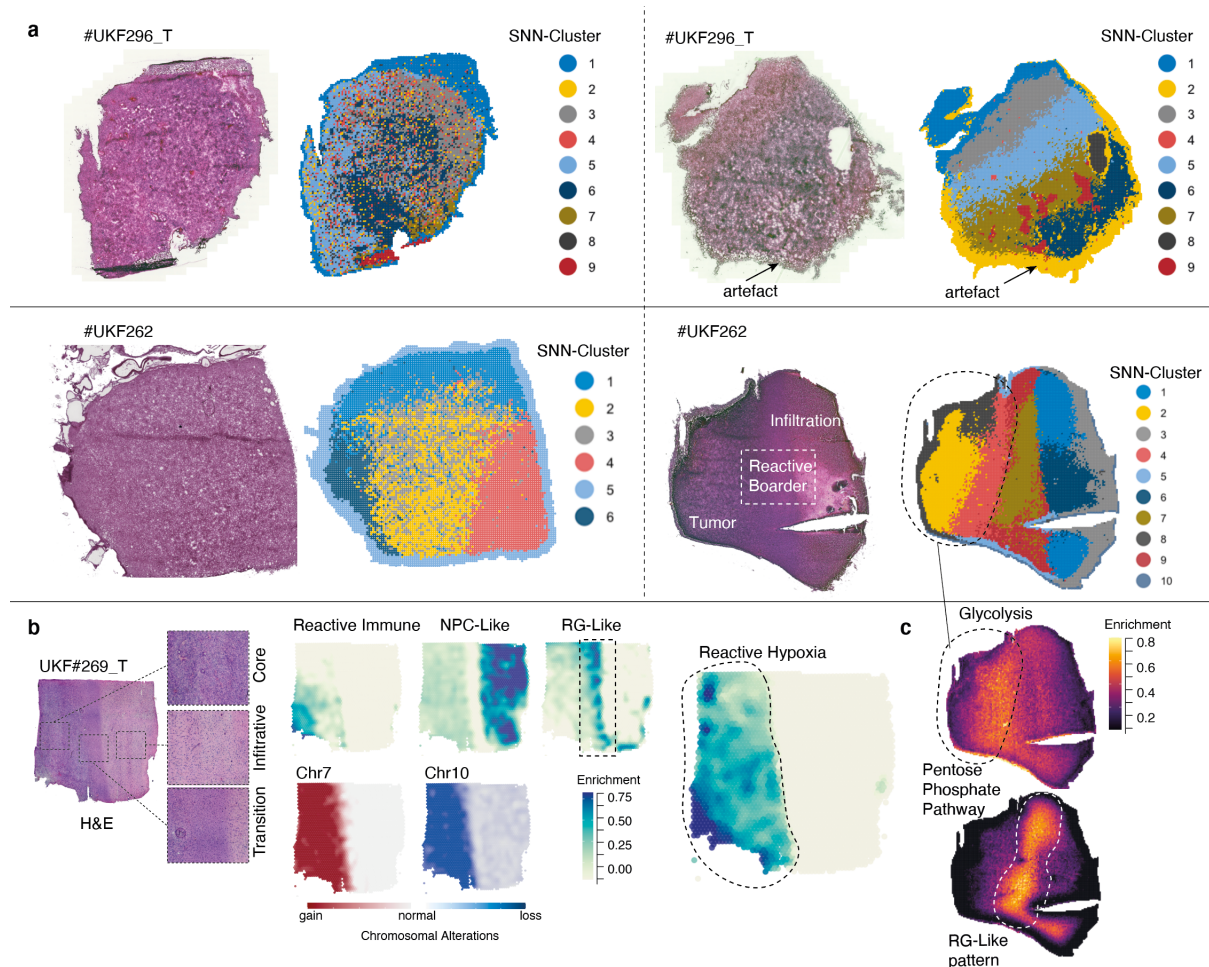

867  
 868 *Extended Data Figure 7: a) H&E staining (left upper) and surface plots with colored clusters (SNN-cluster approach) of MALDI.*  
 869 *Clusters with high probability of noisy signal were located at the edge of each sample, most likely indicating a technical artifact.*  
 870 *These clusters are excluded for analysis. b) Integration of stRNA-seq and MALDI data indicate regional differences of metabolic*  
 871 *processed between tumor core and edge. H&E staining is illustrated at the left side, with magnifications of the three separate*  
 872 *areas, namely the tumor core, border or transition area and the infiltrating edge. CNV analysis confirmed the lack of CNV*  
 873 *alterations at the infiltrating edge (bottom middle plot). Subtype signatures indicate the enrichment of hypoxic areas (upper middle*  
 874 *plot), radial glia-like and NPC-like areas. NPC enrichment is overlaid by the strong enrichment in the non-malignant areas.*  
 875 *Predominantly, the hypoxic enrichment (right surface plot) and RG-like signature sharply separate the areas which were correlated*  
 876 *to distinct metabolic patterns (right plot).*  
 877

878  
879

Extended Data Figure 8:

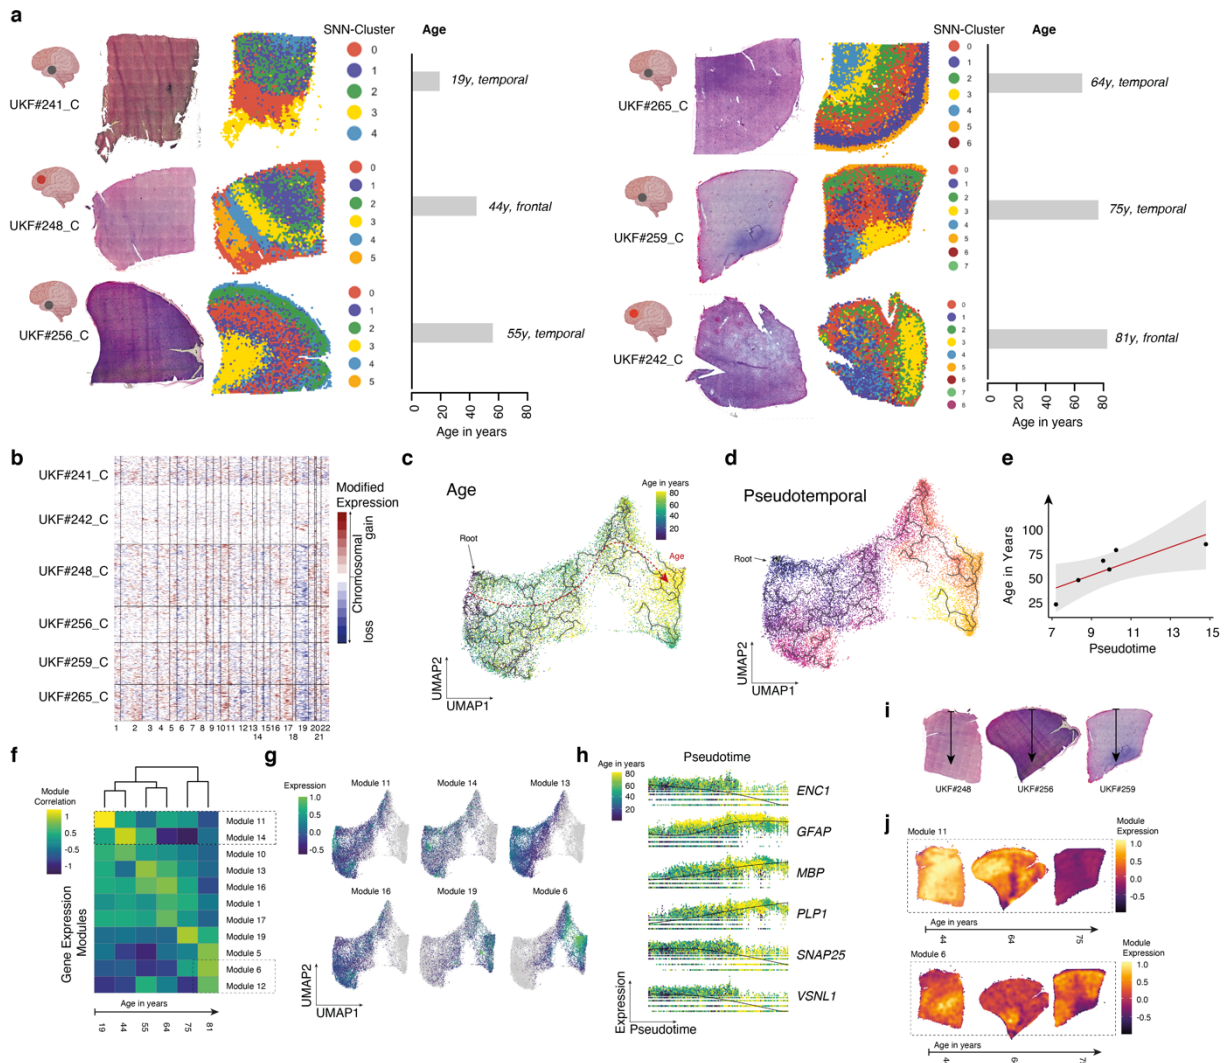

880  
881  
882  
883  
884  
885  
886  
887  
888  
889

Extended Data Figure 8: a) H&E staining (left upper) and surface plots with colored clusters (SNN-cluster approach) of non-malignant cortex samples. The correspondent age is given at the right side. b) CNV heatmap with gains in red and losses in blue indicate no CNV alteration in the collected samples. c-d) Dimensional reduction (UMAP) with colored age (left side, c) and pseudotime annotation (d). e) The pseudotime and real time (age patients) significantly correlate ( $R^2=0.67$ ,  $p=0.031$ ). f) Heatmap of age-related gene expression modules. g) Dimensional reduction (UMAP) with expression scores for age related modules. h) Gene expression of selected age-related genes. Spots are arranged along the pseudotime axis and colors indicate the age. I-j) Surface plots of gene expression scores of different modules.

890 Extended Data Figure 9:

891

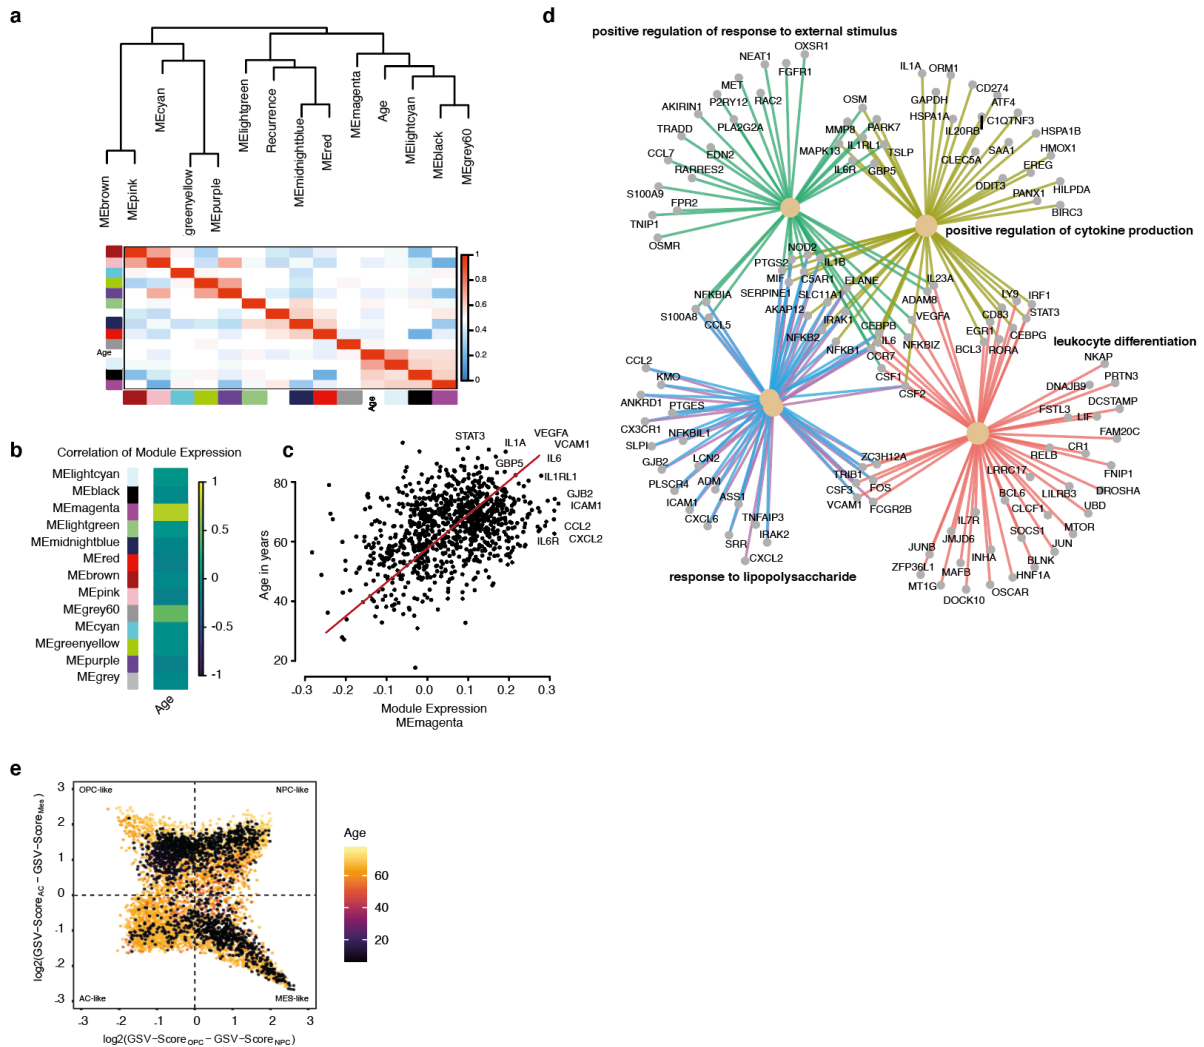

892

893 Extended Data Figure 9: a-b) Weighted correlation network analysis of transcriptional data of the TCGA database. The analysis

894 was designed to identify age-related gene expression signatures. Two modules were found to be significant associated with age

895 (magenta and grey60) (b). c) Scatterplot of age (y-axis) and module expression (x-axis) with significant correlation ( $R^2$  0.76

896  $p < 0.001$ ). Top associated genes as printed. d) GSEA of genes (module magenta) confirmed a strong correlation of age and

897 inflammatory gene expression signatures. e) Four-state scatterplot (Neftel et al.) indicate the four Neftel states based on the

898 signature expression. The age of all patient in the Neftel dataset is annotated and colored.

899

900

901 Extended Data Figure 10

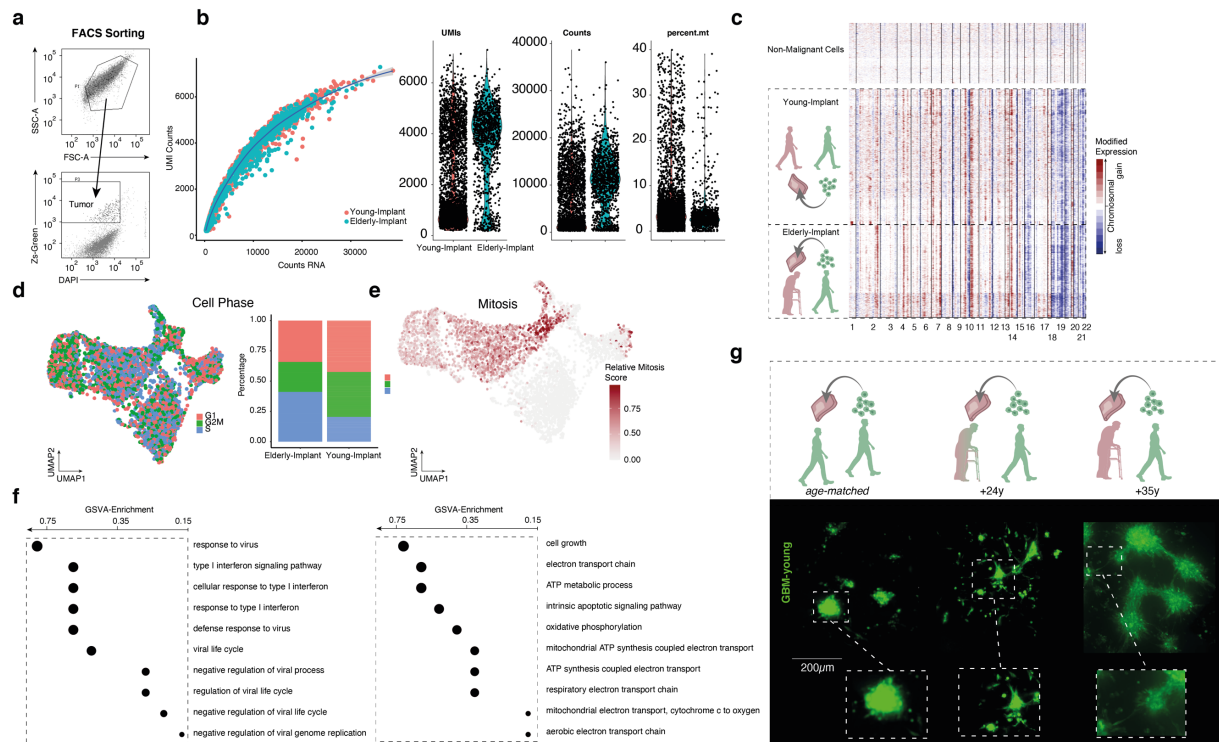

902  
903  
904  
905  
906  
907  
908  
909  
910

Extended Data Figure 10: a) Scatter plots of used gate-strategy for cell sorting. b) Quality plots of the acquired scRNA-seq dataset. c) CNV plot of all cells, sharply separating between tumor and non-malignant cells. d) Dimensional reduction (UMAP) of separated tumor cells (cell phase plot) and correspondent fraction of cell phases between both sample sets. e) Dimensional reduction (UMAP) with colored cycling cells (Mitosis score). f) Enrichment analysis of genes highly differently expressed between both sample sets. g) Staining's of slices with injection of "young tumor cells" (38 years) in slices (n=3) from different age groups. Tumor formation was highly different with a maximum growth in elderly cortex samples.



911 **Supplementary Table:**

912

913 Supplementary Table 1: Tissue Type (Macroscopic): T: Tumor, C: Cortex, TC: Tumor Core: TI: Tumor  
914 Infiltrative region

915 Supplementary Table 2: Gene sets from gene expression modules

916

917 Supplementary Table 3: Gene sets from pattern analysis

918

919

920

921

922
